# 1 **Catecholamines Alter the Intrinsic Variability** 2 **of Cortical Population Activity and Perception**

3  
4 Thomas Pfeffer (1), Arthur-Ervin Avramiea (2), Guido Nolte (1), Andreas K. Engel  
5 (1), Klaus Linkenkaer-Hansen (2), Tobias H. Donner (1,3,4)  
6

7 1 Department of Neurophysiology and Pathophysiology, University Medical  
8 Center Hamburg-Eppendorf, Hamburg, Germany

9 2 Center for Neurogenomics and Cognitive Research, Neuroscience Campus  
10 Amsterdam, VU University Amsterdam, The Netherlands

11 3 Department of Psychology, University of Amsterdam, The Netherlands

12 4 Amsterdam Brain and Cognition, University of Amsterdam, The Netherlands  
13

14 Correspondence:

15 thms.pffr@gmail.com (T.P.)

16 t.donner@uke.de (T.H.D.)  
17

18  
19 **Abbreviated title:** Catecholamines Alter Cortical and Perceptual Variability  
20  
21

22 **ABSTRACT**

23 The ascending modulatory systems of the brainstem are powerful regulators of  
24 global brain state. Disturbances of these systems are implicated in several major  
25 neuropsychiatric disorders. Yet, how these systems interact with specific neural  
26 computations in the cerebral cortex to shape perception, cognition, and behavior  
27 remains poorly understood. Here, we probed into the effect of two such systems,  
28 the catecholaminergic (dopaminergic and noradrenergic) and cholinergic systems,  
29 on an important aspect of cortical computation: its intrinsic variability. To this end,  
30 we combined placebo-controlled pharmacological intervention in humans,  
31 magnetoencephalographic (MEG) recordings of cortical population activity, and  
32 psychophysical measurements of the perception of ambiguous visual input. A  
33 low-dose catecholaminergic, but not cholinergic, manipulation altered the rate of  
34 spontaneous perceptual fluctuations as well as the temporal structure of “scale-  
35 free” population activity of large swaths of visual and parietal cortex.  
36 Computational analyses indicate that both effects were consistent with an  
37 increase in excitatory relative to inhibitory activity in the cortical areas underlying  
38 visual perceptual inference. We propose that catecholamines regulate the  
39 variability of perception and cognition through dynamically changing the cortical  
40 excitation-inhibition ratio. The combined read-out of fluctuations in perception and  
41 cortical activity we established here may prove useful as an efficient, and easily  
42 accessible marker of altered cortical computation in neuropsychiatric disorders.

43

44

## 45 INTRODUCTION

46 The modulatory systems of the brainstem send widespread, ascending  
47 projections to the specialized circuits of the cerebral cortex that mediate  
48 perception, cognition, and goal-directed behavior. These systems regulate  
49 ongoing changes in brain state, even during periods of wakefulness [1–4]. They  
50 are recruited during, and in turn shape, cognitive processes, such as perceptual  
51 inference, learning, and decision-making [5–8]. Because these systems are  
52 implicated in most neuropsychiatric disorders, they are also major targets of  
53 pharmacological therapy of brain disorders [5,9,10]. Taken together,  
54 neuromodulatory systems have remarkably specific effects on cognition, despite  
55 the widespread and diffuse nature of their projections to cortex. An important  
56 challenge for neuroscience is to uncover the mechanistic principles, by which  
57 neuromodulatory systems interact with the cortical computations underlying  
58 cognition.

59 One key parameter of cortical computation that might be under  
60 neuromodulatory control is the intrinsic variability – i.e., fluctuations that occur  
61 during constant (or absent) sensory input [13,14]. Specifically, it has been  
62 proposed that the catecholaminergic neuromodulators noradrenaline and  
63 dopamine may shift the cortical computations underlying decision-making from a  
64 stable (“exploitative”) to a variable (“exploratory”) mode [5,15]. A context-  
65 dependent adjustment of the variability of cortical computations may also be  
66 adaptive for perceptual inference in the face of ambiguous sensory input [16].

67 Animal work has shown that catecholamines and acetylcholine, another  
68 important neuromodulator, alter the intrinsic variability of neural activity [2,11,17–  
69 19] through highly selective interactions with specific elements (pyramidal cells  
70 and/or inhibitory interneurons) of cortical microcircuits [20,21]. But it is unknown

71 how these changes at the level of cortical microcircuits relate to the intrinsic  
72 variability of perception and cognition.

73         At the larger scale of cortical mass action that is assessable with non-  
74 invasive recordings in humans, activity also fluctuates intrinsically, in a spatially  
75 and temporally structured manner [22,23]. The temporal structure of these  
76 fluctuations is characteristic of so-called “scale-free” behavior: Power spectra that  
77 scale as a function of frequency according to a power law,  $P(f) \propto f^{-\beta}$  [24,25],  
78 indicating long-range temporal autocorrelations [26–29]. Some studies have  
79 linked the spatio-temporal structure of the fluctuations in cortical population  
80 activity to specific perceptual and cognitive processes [28,30–32]. But it is  
81 unknown if and how these fluctuations in cortical population activity are  
82 dynamically regulated by neuromodulatory systems.

83         We aimed to close these gaps by systematically quantifying the effects of  
84 catecholaminergic and cholinergic neuromodulation on the intrinsic variability in  
85 perception and large-scale cortical activity in the healthy human brain. To this  
86 end, we combined placebo-controlled, selective pharmacological interventions,  
87 psychophysical measurements of fluctuations in perception in the face of a  
88 continuously presented and ambiguous visual stimulus, and MEG recordings of  
89 fluctuations in cortical population activity.

90         Catecholamines, but not acetylcholine, increased both the variability of  
91 perception as well as long-range temporal correlations of intrinsic cortical activity  
92 in visual and parietal cortex. Based on previous theoretical and experimental  
93 work [33–36], we interpreted the increase in perceptual variability in terms of an  
94 increase in the net ratio between cortical excitation and inhibition in those cortical  
95 regions. Simulating a recurrent neural network under synaptic gain modulation

96 enabled us to show that an analogous mechanism may account for the increase  
97 of long-range temporal correlations of cortical activity under catecholamines.

98

## 99 RESULTS

100 We tested for changes in intrinsic fluctuations of perception and cortical  
101 population activity under placebo-controlled, within-subjects pharmacological  
102 manipulations of catecholamine (using the noradrenaline reuptake inhibitor  
103 atomoxetine) and acetylcholine (using the cholinesterase inhibitor donepezil)  
104 levels (Fig 1A, see Methods for details on the pharmacological interventions).

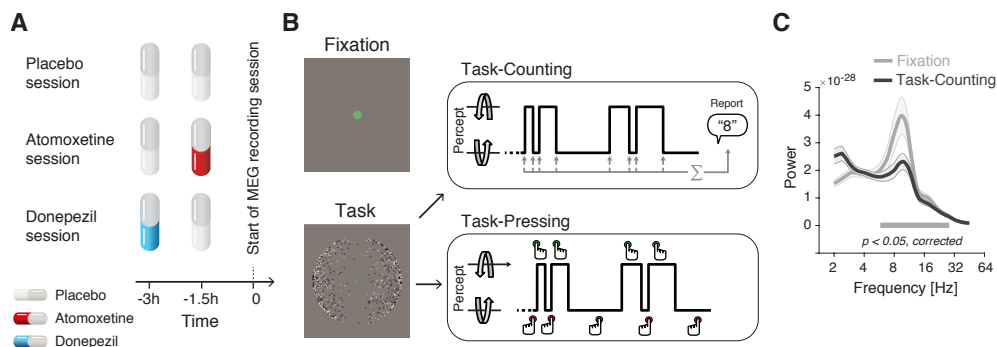

105

106 **Fig 1.** Experimental design **(A, B)** Types and time course of experimental sessions. **(A)** Each  
107 subject participated in three sessions, involving administration of placebo, atomoxetine, or  
108 donepezil (session order randomized across subjects). Each session entailed the administration of  
109 two pills, in the order depicted for the different session types. **(B)** Within each session, subjects  
110 alternated between three conditions, Fixation, Task-Counting and Task-Pressing, during which  
111 MEG was recorded (runs of 10 min each). See Materials and Methods for details. **(C)** Group  
112 average power spectrum, averaged across all MEG sensors, for Rest and Task (Placebo condition  
113 only).

114

115 Fluctuations in cortical activity were measured during two steady-state conditions,  
116 both of which excluded transients in sensory input or motor output (Fig 1B): (i)  
117 fixation of an otherwise gray screen (a condition termed “Fixation”), as in most  
118 studies of human “resting-state” activity [22,23]; and (ii) silent counting of the  
119 spontaneous alternations in the perceptual interpretation of a continuously  
120 presented, ambiguous visual stimulus (dubbed “Task-counting”). In a third  
121 condition that was only used for the analysis of perceptual fluctuations, subjects  
122 immediately reported the perceptual alternations by button press (“Task-

123 pressing”; i.e. associated with movement-related transients in cortical activity).

124 This design capitalized on recent insights into the circuit mechanisms underlying

125 intrinsic perceptual dynamics [33,34,36] which helped constrain the mechanistic

126 interpretation of the results reported below.

127 The Results section is organized as follows. We first present the effects of

128 the “Atomoxetine” and “Donepezil” conditions (each compared against the

129 “Placebo” condition) on the rate of perceptual fluctuations. These effects were in

130 line with a boost in the relative strength of excitatory drive of visual cortex under

131 Atomoxetine. We then show how (i) constant sensory and task drive (i.e., Task-

132 counting vs. Fixation) and (ii) the pharmacological manipulations affect the

133 intrinsic fluctuations in cortical activity. We focus on the temporal auto-correlation

134 structure of intrinsic fluctuations in the amplitude of band-limited cortical

135 population activity (see Methods and Fig 2). Control analyses showing the drug

136 effects on other measures of cortical population activity and peripheral

137 physiological signals support the validity and specificity of our conclusions.

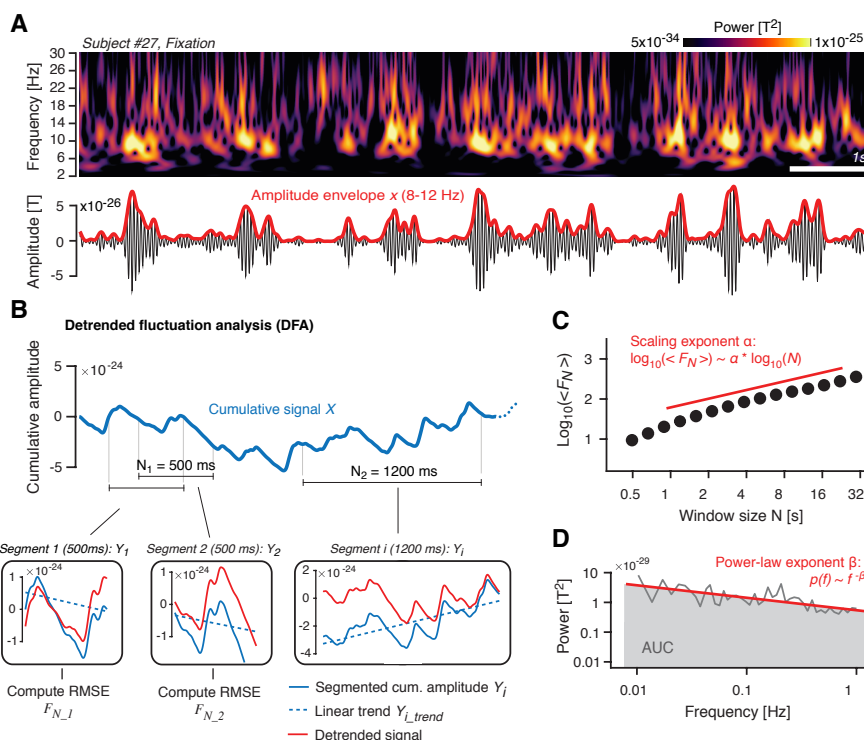

138

139 **Fig 2. Quantifying the temporal structure of fluctuations in oscillatory cortical activity**  
140 **(A)** *Top*. Time-frequency representation of MEG power fluctuations during Rest (example subject).  
141 *Bottom*. Filtered signal (10 Hz; black) and the corresponding amplitude envelope (red). **(B)**  
142 Illustration of detrended fluctuation analysis. See main text (Materials and Methods) for details. *Top*.  
143 Cumulative sum of the amplitude envelope. *Bottom*. Detrending of cumulative sum within segments,  
144 shown for two different window lengths  $N$  ( $N_1 = 500$  ms and  $N_2 = 1200$  ms). **(C)** Root-mean-square  
145 fluctuation function  $\langle F_N \rangle$ . In log-log coordinates,  $\langle F_N \rangle$  increases approximately linearly as a  
146 function of  $N$ , with a slope that is the scaling exponent  $\alpha$ . **(D)** Illustration of power spectrum  
147 analysis of amplitude envelope. In log-log coordinates, the power spectrum can be approximated by  
148 a straight line, with a slope  $\beta$  (power-law exponent) and an area under the curve (gray) that  
149 quantifies the overall variance of the signal.  
150

151 We close with simulations of a patch of recurrently connected excitatory and  
152 inhibitory integrate-and-fire neurons. The simulations show that the changes in  
153 temporal correlations observed in the MEG data can be explained by a  
154 modulation synaptic gain that altered the net ratio between excitatory and  
155 inhibitory activity.

156

### 157 **Atomoxetine increases the rate of bistable perceptual fluctuations**

158 The ambiguous visual stimulus that was continuously presented during both  
159 Task-counting and Task-pressing induced ongoing fluctuations in perception, i.e.,  
160 spontaneous alternations between two apparent rotation directions of 3D-motion  
161 (Fig 1B; see Movie M1), a phenomenon is referred to as multi-stable perception.  
162 The rate of the perceptual alternations reported by the participants provided a  
163 read-out of visual cortical circuit state. Current models explain bistable perceptual  
164 fluctuations in terms of the interplay between feedforward, excitatory drive of  
165 stimulus-selective neural populations in visual cortex, mutual inhibition between  
166 them, stimulus-selective adaptation, and neural “noise” [33,34]. Increases in the  
167 ratio between feedforward, excitatory input to, and mutual inhibition within the  
168 cortical circuit, give rise to faster perceptual alternations. This idea is supported  
169 by convergent evidence from functional magnetic resonance imaging, magnetic  
170 resonance spectroscopy, and pharmacological manipulation of GABAergic  
171 transmission [31,36]. We reasoned that neuromodulators such as noradrenaline

172 might dynamically change these parameters [12,37], and thereby alter the rate of  
173 perceptual fluctuations.

174 Atomoxetine increased the rate of perceptual fluctuations compared to  
175 both Placebo and Donepezil conditions (Fig 3A; Atomoxetine vs. Placebo:  $p =$   
176  $0.007$ ;  $t = 2.913$ ; Atomoxetine vs. Donepezil:  $p = 0.001$ ;  $t = 3.632$ ; Donepezil vs.  
177 Placebo:  $p = 0.966$ ;  $t = -0.043$ ; all paired t-tests, pooled across Task-counting and  
178 Task-pressing). The perceptual alternation rates were highly consistent across  
179 Task-counting and Task-pressing (Fig S1C), supporting the validity of the  
180 counting condition as behavioral read-out of bistable perceptual fluctuations.  
181 Likewise, the Atomoxetine effect on perceptual fluctuation rate was evident for  
182 Task-counting ( $p = 0.045$ ;  $t = 2.103$ ; paired t-test; Fig S1A) and Task-pressing ( $p$   
183  $= 0.018$ ;  $t = 2.540$ ; paired t-test; Fig S1B) individually.

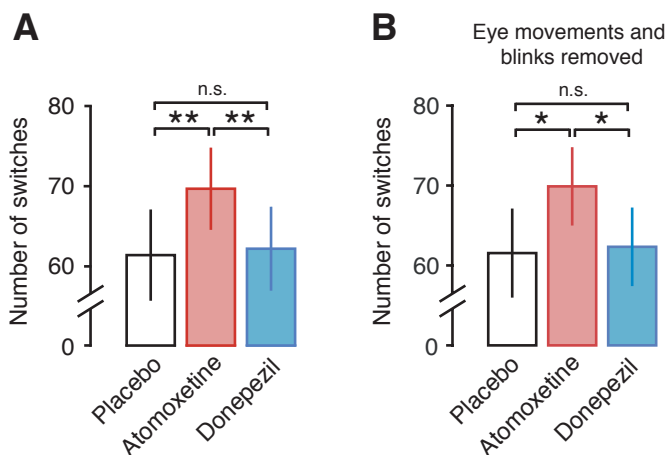

184

185 **Fig 3.** Atomoxetine, but not Donepezil, increases the rate of perceptual alternations **(A)** Number of  
186 perceptual alternations reported by the subjects per 10 min run, pooled across task conditions  
187 (Task-counting and Task-pressing). **(B)** Same as (A), after regressing out blink and eye movement  
188 data (see Methods and Supplementary Figure S2). Significance was assessed using two-sided  
189 paired t-tests (N=28).

190

191 These changes in perceptual fluctuations were not explained by an  
192 increase in the rates of eye blinks or fixational eye movements. First, there was  
193 no significant increase during Atomoxetine compared to Placebo in any of five  
194 different eye movement parameters measured here (Fig S2). Second, none of



195 these parameters correlated with the perceptual alternation rate (Fig S2). Third,  
196 and most importantly, the effect of Atomoxetine on the perceptual dynamics was  
197 also significant after removing (via linear regression) the individual eye movement  
198 parameters (Fig 3B).

199 In sum, Atomoxetine had an effect on bistable perceptual fluctuations that  
200 was both robust and specific, evident when compared with either Placebo or  
201 Donepezil. This effect was in line with an increase in the strength of excitatory  
202 feedforward drive of visual cortex relative to the strength of mutual inhibition  
203 between the neural sub-populations encoding the competing perceptual  
204 interpretations of the ambiguous stimulus. Such an effect should have occurred in  
205 the motion-sensitive visual cortical areas, which implement the visual competition  
206 induced by the ambiguous structure-from-motion stimulus [38,39].

207

### 208 **Atomoxetine increases the scaling exponent of fluctuations in cortical** 209 **population activity**

210 We estimated long-range temporal correlations of band-limited amplitude  
211 fluctuations (indicated by the scaling exponent  $\alpha$ ; see Methods for details) to  
212 quantify intrinsic fluctuations in cortical population activity. Our analyses focused  
213 on amplitude envelope fluctuations in the 8–12 Hz frequency range (“alpha  
214 band”), for two reasons. First, as expected from previous work [40], the cortical  
215 power spectra exhibited a clearly discernible peak in this frequency range, which  
216 robustly modulated with sensory or task drive (suppressed under Task-counting,  
217 Fig 1C). Second, previous studies reported robust long-range temporal  
218 correlations with peaks in the same frequency range [26,29].

219 We first replicated two previously established observations pertaining to  
220 the scaling exponent  $\alpha$ . First, the average across cortical patches and

221 participants was  $\alpha = 0.67$  (s.d. =  $\pm 0.09$ ) during Fixation (Placebo only) and  $\alpha =$   
 222 0.64 (s.d. =  $\pm 0.07$ ) during Task-counting (Placebo only), indicative of long-range  
 223 temporal correlations similar to the ones found in previous work [26,29,41].  
 224 Second, the sensory and task drive during Task-counting reliably reduced  $\alpha$   
 225 compared to Fixation, again as shown in previous work [27,42]. Across all voxels,  
 226  $\alpha$  was significantly larger during Fixation than during Task-counting ( $p = 0.0062$ ;  $t$   
 227 = 2.97; paired t-test; Placebo condition only). This difference was significant  
 228 across pharmacological conditions in large parts of cortex including the occipital  
 229 and parietal regions that were driven by the motion stimulus ( $p < 0.05$ ; cluster-  
 230 based permutation test; Fig 4D).

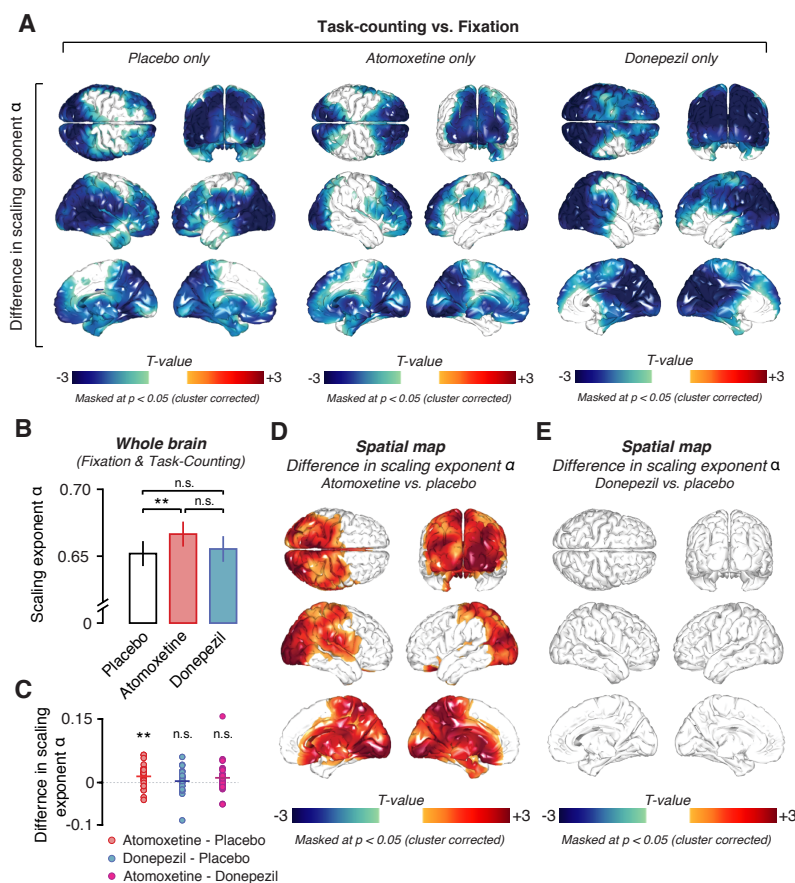

231

232 **Fig 4.** Effects of task and pharmacological conditions on long-range temporal correlations of the  
 233 amplitude envelope of 8-12 Hz MEG activity. **(A)** Spatial distribution of significant differences in  
 234 scaling exponent  $\alpha$  between Task-counting and Fixation during Placebo (left), Atomoxetine  
 235 (middle), and Donepezil (right). **(B)** Comparison between mean scaling exponents  $\alpha$  averaged  
 236 across all the entire brain (see Methods) during the different pharmacological conditions. **(C)**  
 237 Individual subject differences in scaling exponent  $\alpha$  between all drug conditions. **(D, E)** Spatial  
 238 distribution of drug-induced changes in scaling exponents. **(D)** Atomoxetine vs. Placebo. **(E)**

239 Donepezil vs. Placebo. Two-sided permutation tests (N=28); all statistical maps: Threshold at  $p =$   
240 0.05, cluster-based. All drug comparisons are averaged across behavioral conditions, i.e., Fixation  
241 and Task-counting.  
242

243 Having verified the validity of our measurements of  $\alpha$  we then tested for  
244 changes in  $\alpha$  under the pharmacological conditions (Fig 4B-E and Fig 5). There  
245 was a highly significant increase in  $\alpha$  for Atomoxetine compared to Placebo when  
246 collapsing across voxels as well as across Fixation and Task-counting ( $p =$   
247 0.0068;  $t = 2.93$ ; paired t-test, Fig 4B-C). This effect was widespread, but not  
248 homogenous across cortex, comprising occipital and posterior parietal, as well as  
249 a number of midline regions including the thalamus (Fig 4D,  $p = 0.0022$ ; cluster-  
250 based permutation test). Because it is unclear to which extent intrinsic activations  
251 from deep sources can be recovered using MEG, we focus our description and  
252 conclusions on the effects in cortical regions. Importantly, the Atomoxetine effect  
253 on  $\alpha$  was also present at the level of MEG sensors (Fig S4), and hence did not  
254 depend on the source reconstruction method applied here (see Methods).

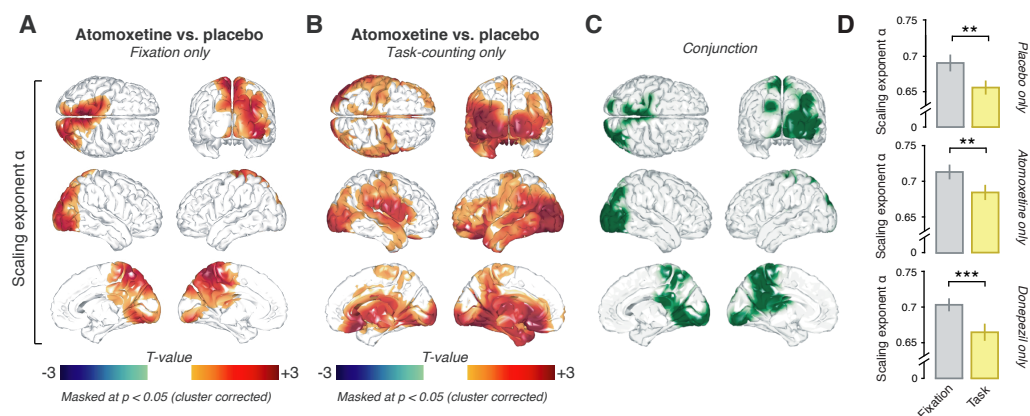

255

256 **Fig 5.** Atomoxetine increases long-range temporal correlations irrespective of behavioral condition.  
257 Spatial distribution of the Atomoxetine-induced changes in scaling exponent  $\alpha$  during (A) Fixation  
258 and (B) Task-counting. (C) Conjunction of maps in (A) and (B), highlighting (in green) voxels with  
259 significant increases in both conditions. (D) Scaling exponents for Fixation (gray) and Task-counting  
260 (yellow) within conjunction cluster depicted in panel C for Placebo (top), Atomoxetine (middle) and  
261 Donepezil only (bottom).  
262

263 The effect of Atomoxetine on  $\alpha$  was subtle, likely due to the low dosage.

264 But, importantly, the effect was highly reproducible across repeated  
265 measurements. We assessed reproducibility with two complementary

266 approaches. The first was a region-of-interest (ROI) analysis. We defined a ROI  
267 in terms of a significant cluster for Atomoxetine > Placebo (one-sided paired t-test,  
268  $p < 0.05$ , uncorrected) during the first run collected in each session (Fixation and  
269 Task-counting collapsed) and extracted this ROI's mean  $\alpha$  from the second run.  
270 We then reversed the procedure and so extracted a second, independent ROI-  
271 based  $\alpha$  and averaged the  $\alpha$ -estimates. This approach revealed a strong  
272 increase under Atomoxetine ( $p = 0.0023$ ;  $t = 3.365$ ). The second approach  
273 assessed the reproducibility of the spatial pattern of effects across both runs. To  
274 this end, we correlated the (non-thresholded) individual maps for the Atomoxetine  
275 vs. Placebo difference computed from the first and second run in each session  
276 (again pooling across Task-counting and Fixation) and tested the resulting  
277 correlation coefficients across participants. The average correlation was  
278 significantly different from zero (mean  $r = 0.29$ ,  $p < 0.0001$ ; permutation test  
279 against zero).

280         The Atomoxetine-related increases in scaling exponent  $\alpha$  were evident  
281 during both Fixation and Task-counting (Fig 5A, Fixation:  $p = 0.0245$ ; Fig 5B,  
282 Task-counting:  $p = 0.0035$ ; cluster-based permutation test). The effects occurred  
283 in largely overlapping regions of occipital and parietal cortex (Fig 5C). There was  
284 no interaction between the effects of Atomoxetine and Task-counting anywhere in  
285 cortex: a direct comparison of the two Atomoxetine vs. Placebo difference maps,  
286 from Fixation and from Task-counting, yielded no significant clusters ( $p > 0.081$   
287 for all clusters; cluster-based permutation test). The same cortical regions in  
288 which  $\alpha$  increased during Atomoxetine exhibited decreases during Task-counting:  
289 When testing for the task-dependent change in  $\alpha$  (Fig 4A) specifically in the  
290 regions comprising the conjunction cluster of the Atomoxetine effect (Fig 5C), the

291 reduction during Task-counting was also highly significant (Fig 5D) in all  
292 pharmacological conditions.

293 In contrast to the robust effect of Atomoxetine on  $\alpha$ , there was no  
294 evidence for an effect of Donepezil at the dosage used here. The difference  
295 between Donepezil and Placebo (collapsed across Fixation and Task-counting)  
296 did not reach significance, neither when pooling across voxels ( $p = 0.50$ ;  $t = 0.68$ ;  
297  $BF = 0.68$ ; paired t-test; Fig 4B), nor when testing all voxels individually ( $p > 0.22$   
298 for all clusters; cluster-based permutation test; Fig 4E; Fig S5). Atomoxetine also  
299 increased the scaling exponents when directly compared to Donepezil during  
300 Task-counting (Fig S6A;  $p < 0.05$ ; two-sided cluster-based permutation test), but  
301 not during Fixation (Fig S6B).

302 Taken together, the rich experimental design gave rise to a highly specific  
303 and consistent pattern of changes in  $\alpha$  under the different experimental  
304 conditions, which helped constrain the mechanistic interpretation of the results.  
305 The Atomoxetine effects were specific, and not just due to the application of any  
306 drug targeting neurotransmitter systems. It is possible that the absence of  
307 detectable Donepezil effects on  $\alpha$  was due to the low dosage or short  
308 administration period used here. However, the control analyses presented in the  
309 next section revealed clear effects of Donepezil on both cortical activity as well as  
310 markers of peripheral nervous system activity.

311

### 312 **Control analyses for the drug effects on other features of cortical dynamics** 313 **or peripheral physiological signals**

314 During Fixation, Atomoxetine and Donepezil both reduced posterior cortical  
315 alpha-band power relative to Placebo in both the 8-12 Hz (Fig 6A;  $p < 0.05$  for all  
316 clusters; two-sided cluster-based permutation test) as well as the 2-8 Hz

317 frequency ranges (Fig S7A). This suppression in low-frequency power under  
318 cholinergic boost is consistent with previous work in rodents [17,18] and humans  
319 [43].

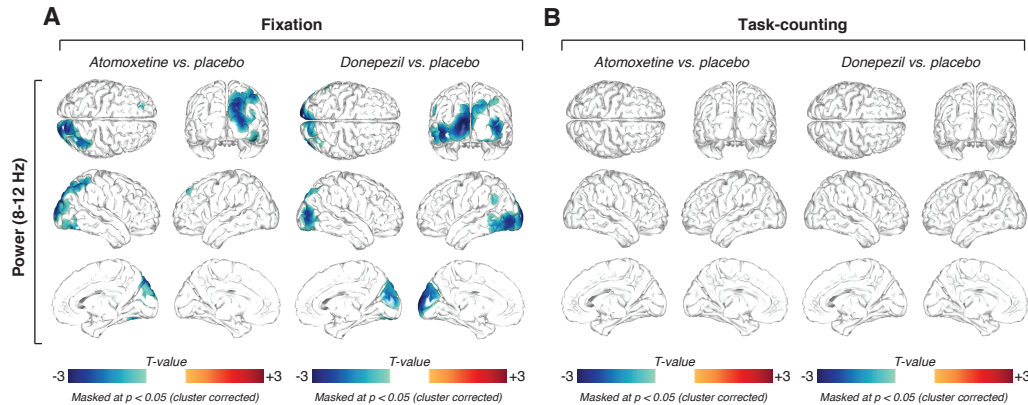

320  
321 **Fig 6.** Similar effects of Atomoxetine and Donepezil on 8-12 Hz power. **(A)** Spatial distribution of  
322 drug-related alpha power changes during Fixation, thresholded at  $p = 0.05$  (two-sided cluster-based  
323 permutation test). *Left.* Power changes after the administration of atomoxetine. *Right.* Power  
324 changes after the administration of donepezil. **(B)** Same as (A), but for Task-counting. All threshold  
325 at  $p = 0.05$ , cluster-based two-sided permutation tests ( $N=28$ ).  
326

327 The Atomoxetine-induced changes on 8-12 Hz power exhibited a different  
328 spatial pattern from the one of corresponding change in the scaling exponent  $\alpha$ :  
329 within the cluster of the significant main effect of Atomoxetine on  $\alpha$  (Fig 4D),  
330 power did not correlate with the changes in  $\alpha$  (group average spatial correlation  
331 between pooled difference maps within cluster;  $r = 0.073$ ;  $p = 0.129$ ,  $BF = 1.065$ ).  
332 During Task-counting, neither drug altered MEG-power in the low-frequencies (8-  
333 12 Hz: Fig 6B,  $p > 0.05$  for all clusters; two-sided cluster-based permutation test;  
334 2-8 Hz: Fig S7B), presumably due to the already suppressed power in the 8-12  
335 Hz range in that condition (Fig 1C). Together with the findings reported in the  
336 previous section, the analyses of the mean MEG power indicate that (i) both  
337 drugs reduced the amplitude of cortical low-frequency oscillations and (ii) MEG  
338 power and the scaling exponent  $\alpha$  reflected at least partially distinct aspects of  
339 intrinsic cortical dynamics

340 We also controlled for changes in peripheral physiological signals under  
341 the drugs as potential confounds of the effect on cortical scaling behavior (Fig 7).

342 As expected, Atomoxetine increased average heart rate (Fig 7A,B). Donepezil  
343 had no detectable effect on average heart rate, during neither Fixation ( $p =$   
344  $0.8676$ ;  $t = 0.16$ ; paired t-test;  $BF = 0.8676$ ; Fig 7A) nor Task-counting ( $p =$   
345  $0.3274$ ;  $t = 1.0$ ; paired t-test;  $BF = 0.3139$ ; Fig 7B). Both drugs altered heart-rate  
346 variability, increasing  $\alpha$  computed on the time series of inter-heartbeat-intervals  
347 (see Methods) in both behavioral contexts relative to Placebo (Fixation:  $p =$   
348  $0.0012$ ,  $t = 3.62$ ; Task-counting:  $p = 0.0167$ ;  $t = 2.55$ ; Fig 7C; Fixation/Donepezil:  
349  $p = 0.0076$ ,  $t = 2.88$ ; Task-counting/Donepezil:  $p = 0.0049$ ,  $t = 3.06$ ; Fig 7D; all  
350 paired t-tests). Critically, the Atomoxetine-induced changes in heart rate showed  
351 no (Task-counting:  $r = 0.00$ ;  $p = 0.99$ ; Person correlation;  $BF = 0.15$ ) or only weak  
352 and statistically non-significant (Fixation:  $r = 0.24$ ;  $p = 0.21$ ; Person correlation;  
353  $BF = 0.31$ ) correlations with the changes in cortical activity (Fig 7A/B, right).  
354 Similarly, the Atomoxetine-related changes in the scaling behavior of inter-  
355 heartbeat intervals were not correlated with the changes in cortical scaling  
356 behavior (Fixation:  $r = 0.22$ ;  $p = 0.26$ ;  $BF = 0.27$ ; Task-counting:  $r = 0.26$ ;  $p =$   
357  $0.19$ ;  $BF = 0.35$ ; Fig 7C/D, right). Atomoxetine also decreased spontaneous blink  
358 rate during Fixation ( $p = 0.034$ ;  $t = 2.24$ ; paired t-test), but not during Task-  
359 counting ( $p = 0.112$ ;  $t = 1.645$ ;  $BF = 1.130$ ; paired t-test; Fig S2B). However,  
360 again there was no significant correlation between changes in blink-rate and  
361 changes in cortical scaling behavior due to Atomoxetine (Fixation:  $r = -0.26$ ;  $p =$   
362  $0.19$ ;  $BF = 0.35$ ; Task-counting:  $r = -0.09$ ;  $p = 0.64$ ;  $BF = 0.16$ ).

*Pfeffer et al: Catecholamines Alter Cortical and Perceptual Variability*

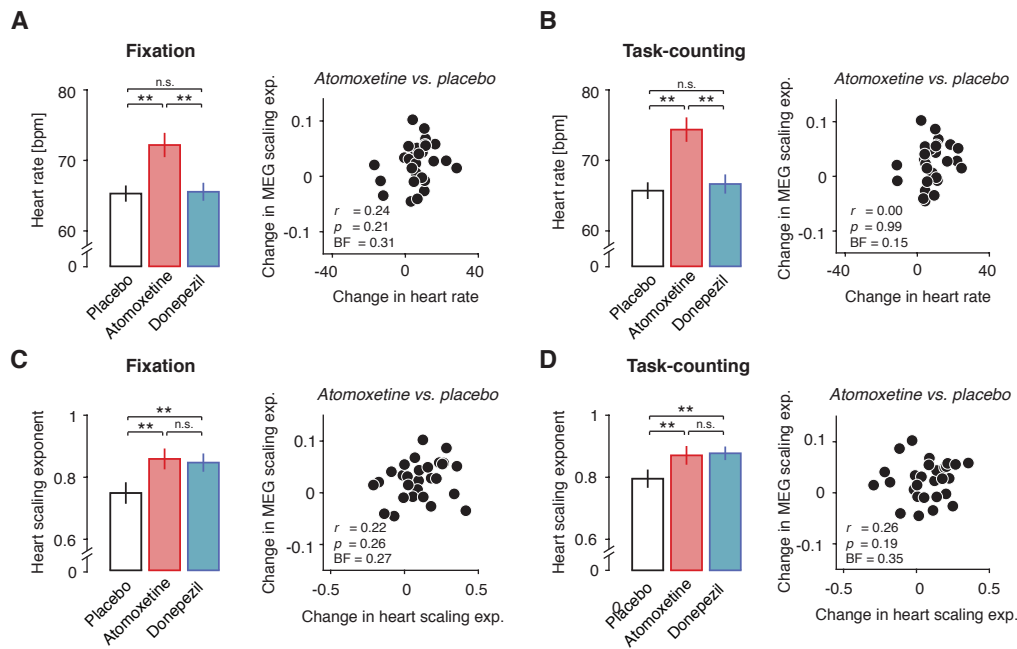

363

364 **Fig 7.** Drug effect on cortical scaling behavior is not explained by systemic drug effects. **(A) Left.**  
 365 Heart rate for Atomoxetine, Placebo and Donepezil during Fixation. **Right.** Correlation of  
 366 Atomoxetine-related changes in heart rate (x-axis) with Atomoxetine-related changes in MEG  
 367 scaling exponent  $\alpha$  (y-axis) (within significant cluster during Fixation). **(B) As (A), but during Task-**  
 368 **counting (C) Right.** Scaling behavior of inter-heartbeat intervals (heart scaling exponent). **Left.**  
 369 Heart scaling exponent for all pharmacological conditions during Fixation. **Right.** Correlation of  
 370 Atomoxetine-related changes in heart scaling exponent (x-axis) with Atomoxetine-related changes  
 371 in MEG scaling exponent  $\alpha$  (y-axis). **(D) Same as (C), but during Task-counting.** Two-sided t-tests  
 372 and Pearson correlations (N=28). BF, Bayes factor.  
 373

374 In sum, drug-induced changes in peripheral physiological signals under  
 375 the drugs, if present, did not account for the Atomoxetine-induced changes in the  
 376 scaling behavior of the fluctuations in cortical activity (Figs 4 and 5). These  
 377 controls support our interpretation in terms of a specific effect on cortical net E/I  
 378 ratio rather than non-specific secondary effects due to the systemic drug effects  
 379 or changes in retinal input due to blinks.

380

381 **Change in scaling exponent under Atomoxetine is consistent with increase**  
 382 **in net E/I ratio in cortical circuits**

383 Atomoxetine had an effect on perceptual fluctuations that was in line with a  
 384 relative increase in excitation in cortical circuits of occipital and posterior parietal  
 385 cortex that processed the ambiguous visual motion stimulus. We reasoned that



386 this change in circuit state might have also produced the observed change in  
 387 scaling behavior of units of intrinsic cortical activity fluctuations under Atomoxetine. In  
 388 order to solidify this intuition, we simulated the activity of a neural network model  
 389 made up of recurrently connected excitatory and inhibitory integrate-and-fire units  
 390 (Fig 8). In what follows, we use the term “E/I ratio” to refer to the ratio of  
 391 excitatory and inhibitory activity across the circuit [44] and “E/I balance” to refer to  
 392 a specific regime of E/I ratios, in which excitation and inhibition changes in a  
 393 proportional way [45–48].

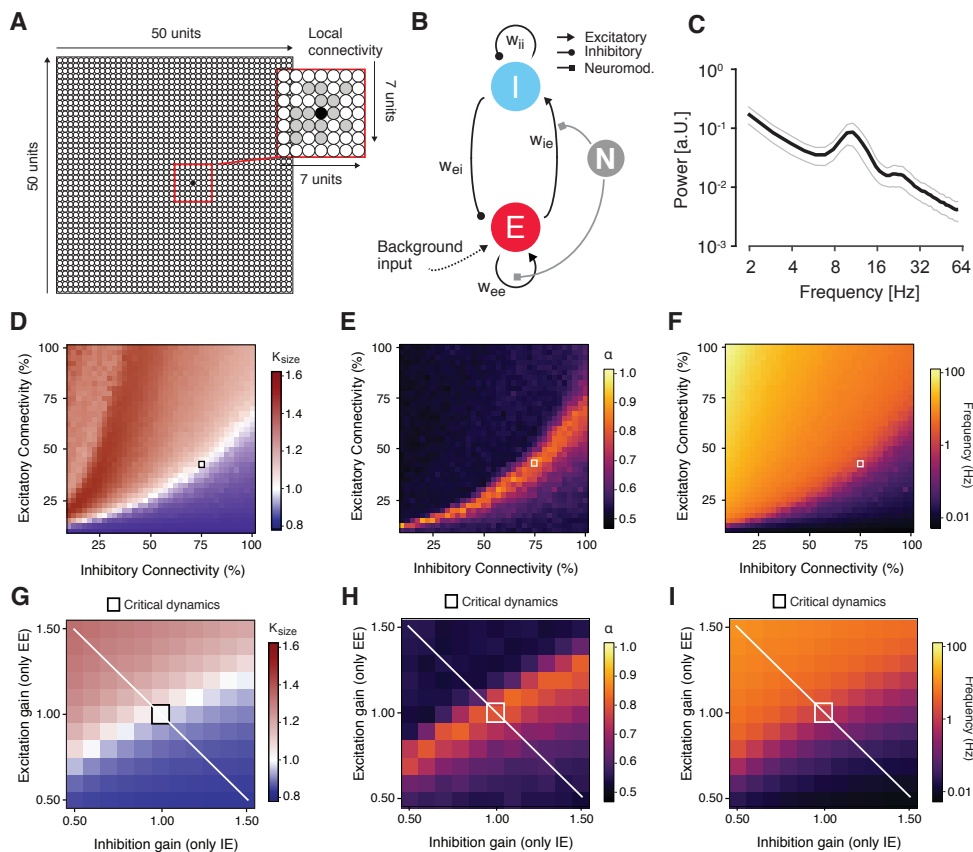

394 **Fig 8.** Changes in scaling behavior in a neural network under gain modulation. **(A)-(I)** Dynamic  
 395 modulation of excitation-inhibition ratio alters long-range temporal correlations in recurrent network  
 396 model. **(A)** Model architecture. The network consisted of 2500 excitatory and inhibitory integrate-  
 397 and-fire units and random, local (within an area of 7x7 units) connectivity (magnified within the red  
 398 square). **(B)** Neuromodulation was simulated as a gain modulation term multiplied with excitatory  
 399 synaptic weights ( $w_{ee}$  and  $w_{ie}$ ). **(C)** Power spectrum of the simulated neural mass activity, with a  
 400 peak in the alpha range. **(D)**  $\kappa$  as a function of excitatory and inhibitory connectivity (with a spacing  
 401 of 2.5%; means across 10 simulations per cell). The region of  $\kappa \sim 1$ , overlaps with the region of  $\alpha >$   
 402 0.5 and splits the phase space into an excitation-dominant ( $\kappa > 1$ ) and an inhibition-dominant region  
 403 ( $\kappa < 1$ ). The black square depicts the network configuration that was chosen for assessing the effects  
 404 of neuromodulation **(E)** Scaling exponent  $\alpha$  as a function of excitatory and inhibitory connectivity.  
 405 **(F)** Same as (D) and (E), but for mean firing rate. **(G)**  $\kappa$  as a function of independent synaptic gain  
 406 modulation. Red square, baseline state of critical network before synaptic gain modulation. White  
 407 line, axis corresponding to largest change in ratio **(H)** Same as (D), but for scaling exponent  $\alpha$ . **(I)**  
 408 Same as (G) and (H), but for firing rate.

410  
411           We started from a network (Figure 8A) that was similar to the one  
412 developed and analyzed in a previous study [49]. The basic features of the model  
413 were as follows. The model was built to generate oscillations of neural mass  
414 activity (summed across all units) in the alpha-band (8-12 Hz; Figure 8B). The  
415 amplitude envelope of these oscillations fluctuated over time, with scale-free  
416 long-range temporal correlations. Those scale-free intrinsic fluctuations in cortical  
417 activity were sensitive to variations in the percentage of excitatory and inhibitory  
418 connections in the circuit (i.e., microstructure). Our previous work [49],  
419 reproduced here (Figure 8D-F) showed that such a model accounts for the joint  
420 emergence of two scale-free phenomena at different spatial scales (single unit  
421 activity vs. mass activity) and temporal scales (tens of milliseconds vs. hundreds  
422 of seconds): (i) neuronal avalanches with an event size distribution following a  
423 power-law; and (ii) long-range temporal correlations of the amplitude envelope  
424 fluctuations of the circuits mass activity. Both phenomena have been established  
425 in empirical measurements of cortical population activity [26,50]. Neuronal  
426 avalanches are activity deflections (i.e., exceeding a certain threshold) that  
427 propagate through the cortical network [50], with an “event size” corresponding to  
428 the number of activated units. In line with (Shew et al., 2009) we quantified the  
429 power-law scaling of the size distributions of avalanches in the model with the  
430 kappa-index ( $\kappa$ ): the similarity between the actual event size distribution and a  
431 power-law distribution with an exponent of -1.5; A  $\kappa$  of 1 indicates perfect match  
432 between the two.

433           We extended this model by means of a multiplicative modulation of  
434 synaptic gain [37,51] (Fig 8B). This allowed us to explore how catecholaminergic  
435 effects on neural circuits might change the two phenomena of scale-free neural  
436 population activity described above. We first determined the structural

437 connectivity (small squares in Fig 8D-F) and the time scale parameters of the  
438 model such that the network generated intrinsic alpha-band oscillations (Fig 8C)  
439 with amplitude fluctuations that exhibited neuronal avalanches with scale-free  
440 event size distributions (Fig 8D) as well as long-range temporal correlations (with  
441  $\alpha \sim 0.85$ ). We then independently modulated specific excitatory or inhibitory  
442 connections through the multiplicative scaling of the corresponding synaptic  
443 weights, in two ways. In the version shown in Fig 8, we modulated only excitatory  
444 synapses, but independently on excitatory as well as inhibitory neurons (EE and  
445 IE), thus producing asymmetries in the circuits net E/I ratio as in recent modeling  
446 work on a cortical circuit for perceptual decision-making [44]. In the second  
447 version (Fig S8A), we co-modulated EE and IE and independently modulated  
448 inhibitory synapses on excitatory neurons (EI). This was intended to specifically  
449 simulate glutamate receptors (AMPA or NMDA) in former two cases (mediating  
450 the effects of excitatory neurons) as opposed to modulations of GABA receptors  
451 in the latter case (mediating the effects of inhibitory neurons on others).  $N_{EE}$  and  
452  $N_{IE}$  were co-modulated by the same factor for simplicity, because we did not  
453 assume that excitatory (glutamatergic) synapses would be differentially  
454 modulated depending on whether they were situated on excitatory or inhibitory  
455 target neurons.

456 Both types of changes in net E/I ratio robustly altered  $\kappa$  (Fig 8G and Fig  
457 S8B),  $\alpha$  (Fig 8H and Fig S8C), and the mean firing rate (Fig 8I). The effect of  
458 changes in E/I ratio on the scaling exponent  $\alpha$  were non-monotonic, dependent  
459 on the starting point: increases in excitation led to increases in  $\alpha$  when starting  
460 from an inhibition-dominant point, but to decreases in  $\alpha$  when starting from an  
461 excitation-dominant point (Fig 8H, white line). The effects of excitatory and  
462 inhibitory gain modulation on the temporal correlation structure of the simulated

463 population activity were qualitatively similar to the effects of changes in the  
464 fraction of excitatory and inhibitory synapses simulated (as shown in Fig 8D-F).  
465 The latter simulated individual differences in cortical anatomical microstructure,  
466 and the former simulated state-dependent changes in cortical circuit interaction,  
467 which occur within an individual brain.

468 In the model, the scaling exponent  $\alpha$  exhibited a non-monotonic  
469 dependence on E/I ratio (see the white diagonal line in Fig 8G-I and schematic  
470 depiction in Fig 9). Consequently, without knowing the baseline state, any change  
471 in  $\alpha$  was ambiguous with respect to the direction of the change in E/I ratio (i.e.,  
472 towards excitation- or inhibition-dominance). Thus, the observed increase in  $\alpha$   
473 under Atomoxetine during Fixation could have been due to either an increase or  
474 a decrease in E/I ratio.

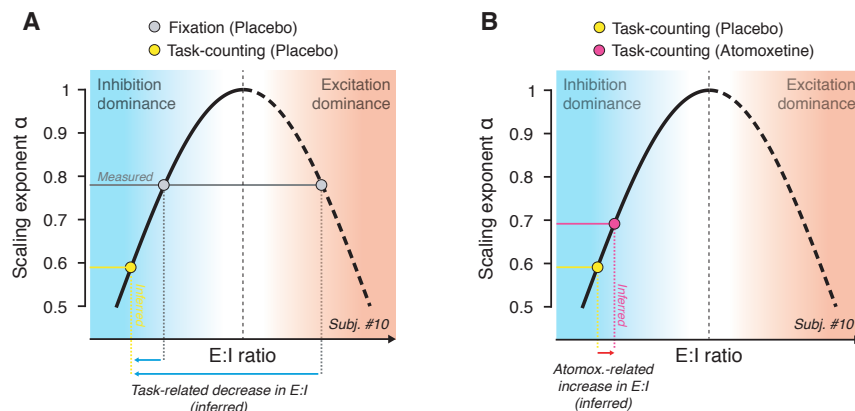

475

476 **Fig 9.** Schematic of inference from observed change in scaling exponents to net E/I ratio (see  
477 Results for details). The non-monotonic dependence of scaling exponent  $\alpha$  on E/I ratio  
478 (corresponding to white line in panel H) is replotted schematically. **(A)** Measured scaling exponent  
479  $\alpha$  during Fixation (gray) can result from both, inhibition- or excitation-dominant regimes; the  
480 baseline is unknown. Assuming that sensory drive (Task-counting; yellow dot) either decreases or  
481 does not change E/I ratio, the observed decrease in scaling exponent during Task-counting (yellow)  
482 reflects a shift towards the inhibition-dominance (blue arrows), consistent with animal physiology  
483 [52,53]. **(B)** This constrains the baseline state for the interpretation of the Atomoxetine-induced  
484 increase in scaling exponent during Task-counting (red): The latter increase likely reflects an  
485 increase in E/I ratio (red arrow).  
486

487 Importantly, insights from animal physiology helped constrain the baseline  
488 state during Task-counting: In the awake state, visual drive decreases E/I ratio in  
489 visual cortex V1, due to the recruitment of inhibitory mechanisms that outweigh

490 the excitatory sensory drive [52,53]. We assumed that the same held for the  
491 Task-counting condition (constant visual stimulation) of our study.

492 This condition enabled us to infer the change in net E/I ratio under  
493 Atomoxetine. The rationale is illustrated in Fig 9. The animal physiology results  
494 referred to above indicate that the observed decrease in  $\alpha$  during Task-counting  
495 was due to a shift towards inhibition-dominance (yellow point in Fig 9A). Under  
496 this assumption, the Atomoxetine-induced increase in  $\alpha$  during was due to an  
497 increase in net E/I ratio (Fig 9B). Because the effects of Atomoxetine on  $\alpha$  were  
498 the same during Task-counting and Fixation, it is likely that the same mechanism  
499 was at play during Fixation.

500 In sum, under certain, the simulations provided a mechanistic explanation  
501 for the observed MEG effects: effective changes in the cortical E/I ratio, due to  
502 multiplicative changes of synaptic gain [37] or other mechanisms [12,20] – the  
503 same conclusion inferred from the increase in the rate of perceptual alternations  
504 above.

505

## 506 **DISCUSSION**

507 Neuromodulators regulate ongoing changes in the operating mode of cognitive  
508 processes [1,5,6,10,54] as well as of cortical microcircuits [11,12,17,18,20,21].  
509 Here, we unraveled the effect of two major classes of neuromodulators,  
510 catecholamines and acetylcholine, on the intrinsic variability of cortical  
511 computation, an important parameter shaping the operating mode. We used two  
512 separate read-outs of this parameter: (i) the rate of fluctuations in perception  
513 induced by ambiguous visual input and (ii) the temporal correlation structure of  
514 (scale-free) fluctuations of the amplitude envelope of band-limited cortical mass  
515 activity. Catecholamines, but not acetylcholine, altered both read-outs.

516 Simulations of a recurrent neural network revealed that, under well supported  
517 physiological assumptions,, the observed changes in the temporal structure of  
518 fluctuations in cortical activity is indicative of an increase in the cortical E/I ratio.  
519 Earlier modeling and empirical data show that such an increase in net E/I ratio in  
520 visual cortex is also consistent with the increased rate of perceptual fluctuations  
521 under the catecholaminergic boost.

522

### 523 **Cortical distribution of Atomoxetine effects on cortical activity fluctuations**

524 The Atomoxetine effects on the scaling exponent were widespread across cortex,  
525 but not entirely homogenous. They were pronounced across occipital and parietal  
526 cortex, but not robust in frontal cortex (see Fig 5B). This distribution might point to  
527 a noradrenergic, rather than dopaminergic origin. Atomoxetine increases the  
528 levels of both catecholamines, noradrenaline and dopamine, but the cortical  
529 projection zones differ substantially between both systems: Dopaminergic  
530 projections mainly target prefrontal cortex [55] and only sparsely to occipital  
531 cortex [56,57], whereas the noradrenergic projections are more widespread and  
532 strong to occipital and parietal cortex [58]. Alternatively, this distribution may  
533 reflect the different receptor composition across cortical regions [58,59]. The  
534 relative frequency of the different noradrenaline receptors differs between pre-  
535 frontal and posterior cortex [58], which might translate a homogenous  
536 noradrenaline release into a heterogeneous effect on the activity in these  
537 different cortical regions. An important next step will be to investigate the  
538 differential role of different noradrenaline receptors, and different regional  
539 receptor profiles, in shaping the cortex-wide effect of noradrenaline on long-range  
540 temporal correlations.

541

542 **Opposite effects of external drive and catecholamines on long-range**  
543 **temporal correlations**

544 Consistent with our current results, previous studies also found a decrease in  
545 temporal autocorrelations of cortical activity due to external drive [27,42]. The  
546 observation is consistent with the insight from intracellular recordings of cortical  
547 neurons in animals, that cortical responses to sensory stimulation in the awake  
548 state are dominated by inhibition [52,53,60,61]. One candidate source of this  
549 sensory-driven state change is thalamocortical inhibition [62], but intracortical  
550 feedback inhibition might also contribute [63]. Modeling work shows that the  
551 driven state is associated with shortened temporal autocorrelations as well as a  
552 decrease in the entropy of activity states in large-scale cortical networks [64].  
553 Correspondingly, the increase in long-range temporal autocorrelations under  
554 catecholaminergic modulation may be associated with an increase in entropy –  
555 that is, a tendency to explore a larger set of cortical activity states. It is tempting  
556 to link this to the prominent idea that high sustained noradrenaline levels promote  
557 an exploratory mode of cortical computation and behavior [5].

558

559 **Convergent evidence for catecholaminergic increase in cortical E/I ratio**

560 Cortical circuits maintain a tight balance between excitation and inhibition, which  
561 is largely preserved across contexts and levels of the cortical hierarchy [46,48].  
562 However, even in the absence of changes in sensory input, neuromodulators  
563 such as noradrenaline and acetylcholine can change the cortical E/I ratio [65,66].  
564 The E/I ratio, in turn, shapes the computational properties of cortical circuits  
565 [67,68], and thereby the behavior of the organism [37,44,69]. Substantial  
566 evidence already points to significant changes in E/I ratio in schizophrenia and

567 autism [70–72]. Similar changes might be at play in other brain disorders as well  
568 [73].

569 Our simulations indicated that the temporal correlation structure of neural  
570 population activity, as measured with the scaling exponent  $\alpha$ , is sensitive to  
571 changes in E/I ratio, produced through synaptic gain modulation (see the white  
572 line in Fig 8H). In both versions of our model, the neuromodulatory effects were  
573 not perfectly symmetric (see the deviations of peak scaling exponents from main  
574 diagonal in Fig 8H). While the latter effect was small and may be specific to the  
575 details of the model, it remains possible that the subtle changes in scaling  
576 exponents we observed were produced through symmetric gain modulations that  
577 maintained the net E/I balance (i.e., along the main diagonal). However, two  
578 additional lines of evidence converge on our conclusion that catecholamines (in  
579 particular noradrenaline) boosted E/I ratio. First, in the same participants, the  
580 catecholaminergic manipulation had a reliable effect on the perceptual switch rate,  
581 which is also indicative of cortical E/I ratio [33,34,36]. Second, results invasive  
582 rodent work also point to an increase in cortical E/I ratio under noradrenaline:  
583 Noradrenaline was found to decrease spontaneous inhibition in auditory cortex  
584 [66] and mediate a tonic depolarization of visual cortical neurons during  
585 locomotion [20].

586

### 587 **No evidence for donepezil effects on cortical or perceptual fluctuations**

588 The absence of an effect of Donepezil on either perceptual fluctuations or long-  
589 range temporal correlations of cortical activity may be due to the small dosage or  
590 the single administration of the drug in our study. Even so, our donepezil  
591 manipulation was sufficient to robustly change heart rate variability and, more  
592 importantly, low-frequency power of cortical activity, an established marker of



593 cholinergic action in cortex [17,18,43,74]. The lack of the effects of donepezil on  
594 perceptual fluctuations and cortical scaling behavior might also be due to the  
595 specific properties of cholinergic action on the cortical net E/I ratio. Invasive  
596 evidence indicates that acetylcholine can rapidly disinhibit pyramidal cells by  
597 activating a chain of two inhibitory interneurons [21], a mechanism that may alter  
598 E/I ratio mainly during stimulus-evoked responses [65]. By contrast,  
599 noradrenaline also alters the levels of tonic inhibition of pyramidal cells occurring  
600 spontaneously [66]. This might explain the dissociation between the effects of  
601 atomoxetine and donepezil under the current steady-state conditions, which  
602 excluded (or minimized) stimulus-evoked transients .

603

#### 604 **Functional consequences of changes in net cortical E/I ratio**

605 We observed a selective increase in the rate of spontaneous perceptual  
606 alternations under catecholaminergic adding to evidence that these dynamics are  
607 under neuromodulatory control [75]. Such a change could be due to an increase  
608 in cortical “noise” [33]. Future invasive studies should relate catecholaminergic  
609 changes in the variability of the spiking activity [76] of neurons contributing  
610 directly to the contents of multi-stable perception.

611 We suspect that an increase in cortical E/I ratio will have particularly  
612 strong effects on behavior when affecting parietal and prefrontal cortical circuits  
613 characterized by slow intrinsic timescales [30,32,77] and involved in persistent  
614 activity during working memory and the slow accumulation of information over  
615 time [69]. It is possible that the catecholaminergic effects on parietal cortex we  
616 observed here reflects an increase in the recurrent excitation, which, is essential  
617 for sustained processes such as working memory [78] as well as information  
618 integration during decision-making [32,79]. Future work should assess this

619 through the use of tasks probing into network reverberation and information  
620 accumulation in association cortex.

621

### 622 **A control parameter for critical network dynamics**

623 In our model, long-range temporal correlations in the fluctuations of neural mass  
624 activity (i.e., activity summed across the entire local network) [26] and avalanches  
625 within the neuronal network [50] jointly emerge at the same E/I ratio. Both  
626 phenomena are commonly interpreted as hallmarks of “criticality” [26,29,50,80] –  
627 a state of a complex dynamical system poised between order and chaos [81–83].

628 It has been proposed that the cortex operates in a narrow regime around  
629 criticality [83,84], potentially optimizing its computational capacities [80,85–88]. A  
630 number of reports showed that cortical dynamics may continuously vary around  
631 the critical state [89–92], but the source of these fluctuations has, so far,  
632 remained unknown. Here, we have identified catecholaminergic neuromodulation  
633 as an endogenous factor controlling these spontaneous variations in critical  
634 dynamics.

635 In complex systems, critical dynamics can emerge in a self-organized  
636 fashion [81], or through an external control parameter that fine-tunes the system.  
637 The tuning of temperature in the Ising model of spin magnetization [83] is a  
638 common example for the latter case. It is tempting to speculate that  
639 catecholaminergic tone serves as such a control parameter in the cerebral cortex.

640

### 641 **Link between catecholaminergic effects on fluctuations in perception and** 642 **cortical mass activity**

643 We here used two read-outs of catecholaminergic effects, constituting two distinct  
644 expressions of the resulting changes in cortical circuit state. The envelope of

645 cortical alpha-band oscillations collapsed across large chunks of cortex is unlikely  
646 to encode the contents of perception in the phenomenon studied here. The  
647 perceived direction of 3D-motion, which fluctuates spontaneously, is encoded in  
648 fine-grained patterns of neural population activity within motion-sensitive visual  
649 cortical areas [39,93]. The power of alpha-band oscillations is a more global  
650 feature of cortical population activity, which is likely insensitive to the fine-grained,  
651 within-area patterns of neural population activity. The widespread release of  
652 neuromodulators changes also the cortical circuit state, specifically E/I ratio, in a  
653 widespread manner. Such changes, in turn, alter the highly specific (fine-grained)  
654 interactions between percept-selective populations of visual cortical neurons that  
655 give rise to the perceptual dynamics [33,34,36]. Thus, although both read-outs  
656 likely tap into similar changes in global cortical circuit state, there is no one-to-to  
657 mapping between them.

658

### 659 **Limitations of the current modeling approach**

660 While our model simulations provided important mechanistic insights, the model  
661 has limitations that should be addressed in future work. First, different from the  
662 MEG data, the power of alpha-band oscillations behaves similarly to the scaling  
663 exponents in the model (Fig S8E). This is because the model oscillations emerge  
664 from the same recurrent neuronal interactions within the patch that also shape  
665 the long-range temporal correlations in the envelopes of the amplitude envelopes  
666 of these oscillations. By contrast, in the brain, alpha-band power of local cortical  
667 mass signals is likely affected by a variety of sources other than local circuits, for  
668 instance alpha-frequency modulated input from the thalamus [94]. This might  
669 lead to dissociations between changes in MEG power and long-range temporal  
670 correlations of the power fluctuations which the model does not capture in its

671 present form. Second, the model lacks long-range excitatory connections, which  
672 are prominent in the real cortex, and whose effects on the correlation structure of  
673 cortical fluctuations are largely unknown.

674

## 675 **Conclusion**

676 The combined measurement of fluctuations in bistable perception as well as in  
677 cortical mass activity under steady-state conditions provides an easily assessable,  
678 multi-level read-out of pharmacological effects on cortical computation. In our  
679 study, this read-out supported the idea that catecholamines boost the intrinsic  
680 variability of perception and behavior, an effect that might be mediated by an  
681 increase in the net E/I ratio in the visual cortical system. This read-out may be  
682 useful for inferring changes in cortical E/I ratio in neuropsychiatric disorders, or in  
683 their pharmacological treatment in future work.

684

## 685 **METHODS**

### 686 **Pharmacological MEG experiment**

#### 687 *Participants*

688 30 healthy human participants (16 females, age range 20-36, mean 26.7)  
689 participated in the study after informed consent. The study was approved by the  
690 Ethical Committee responsible for the University Medical Center Hamburg-  
691 Eppendorf. Two participants were excluded from analyses, one due to excessive  
692 MEG artifacts, the other due to not completing all 3 recording sessions. Thus, we  
693 report results from N=28 participants (15 females). In one of those participants,  
694 one Task-counting run (during the Atomoxetine condition) was not recorded due  
695 to a software problem with the data acquisition computer.

696

697 *General design*

698 We pharmacologically manipulated the levels of catecholamines (noradrenaline  
699 and dopamine) and acetylcholine in a double-blind, randomized, placebo-  
700 controlled, and cross-over experimental design (Fig 1A, B). Each participant  
701 completed three experimental sessions, consisting of drug (or placebo) intake at  
702 two time points, a waiting period of 3 hours, and an MEG recording. During each  
703 MEG session, participants were seated on a chair inside a magnetically shielded  
704 MEG chamber. Each session consisted of 6 runs of different tasks, each of which  
705 was 10 minutes long and followed by breaks of variable duration.

706

707 *Pharmacological intervention*

708 We used the selective noradrenaline reuptake inhibitor atomoxetine (dose: 40  
709 mg) to boost the levels of catecholamines, specifically noradrenaline and (in  
710 prefrontal cortex) dopamine [10]. We used the cholinesterase inhibitor donepezil  
711 (dose: 5 mg) to boost acetylcholine levels. Atomoxetine is a relatively selective  
712 inhibitor of the noradrenaline transporter, which is responsible for the natural  
713 reuptake of noradrenaline that has been released into the extracellular space.  
714 Consequently, atomoxetine acts to increase the extracellular levels of  
715 noradrenaline, an effect that has been confirmed experimentally in rats prefrontal  
716 cortex [95]. The same study showed that atomoxetine also increases the  
717 prefrontal levels of dopamine, which has a molecular structure very similar to the  
718 one of noradrenaline and is, in fact, a direct precursor of noradrenaline.  
719 Atomoxetine has smaller affinity to the serotonin transporter, and there are  
720 discrepant reports about the quantitative relevance of these effects: While one  
721 study found no increases in serotonin levels under atomoxetine [95], a recent  
722 study reports a significant atomoxetine-related occupancy of the serotonin

723 transporter in non-human primates [96] at dosages which would correspond to  
724 human dosages of 1.0 – 1.8 mg/kg. Note, that these dosages are substantially  
725 higher than the administered dosage in this study (40 mg, independent of body  
726 weight). It is, therefore, unclear to which extent our Atomoxetine condition  
727 affected cortical serotonin levels.

728 Donepezil is a selective inhibitor of the enzyme acetylcholinesterase,  
729 which breaks up all the extracellular acetylcholine to terminate its synaptic action.  
730 Consequently, donepezil acts to increase the extracellular levels of acetylcholine.  
731 Donepezil is also an agonist of the endoplasmatic  $\sigma_1$ -receptor, which  
732 modulates intracellular calcium signaling.

733 A mannitol-aerosil mixture was administered as placebo. All substances  
734 were encapsulated identically in order to render them visually indistinguishable.  
735 Peak plasma concentrations are reached ~3-4 hours after administration for  
736 donepezil [97] and 1-2 hours after administration for atomoxetine [98],  
737 respectively. We adopted the following procedure to account for these different  
738 pharmacokinetics (Fig 1A): participants received two pills in each session, one 3  
739 h and another 1.5 h before the start of MEG recording. In the Atomoxetine  
740 condition, they first received a placebo pill ( $t = -3$  h) followed by the atomoxetine  
741 pill ( $t = -1.5$  h). In the Donepezil condition, they first received the donepezil pill ( $t =$   
742  $-3$  h), followed by placebo ( $t = -1.5$  h). In the Placebo condition, they received a  
743 placebo at both time points. The half-life is ~ 5 h for atomoxetine [98] and ~ 82 h  
744 for donepezil, respectively [97]. In order to allow plasma concentration levels to  
745 return to baseline, the three recording sessions were scheduled at least 2 weeks  
746 apart. This design ensured maximum efficacy of both pharmacological  
747 manipulations, while effectively blinding participants as well as experimenters.

748

749 *Stimuli and behavioral tasks*

750 In each session, participants alternated between three different task conditions (2  
751 runs à 10 minutes per condition) referred to as Fixation, Task-counting, and  
752 Task-pressing in the following (Fig 1B). All conditions entailed overall constant  
753 sensory input. Fixation and Task-counting also entailed no overt motor responses  
754 and are, therefore, referred to as “steady-state” conditions in the following. We  
755 used these steady-state conditions to quantify intrinsic fluctuations in cortical  
756 activity. Task-pressing entailed motor responses and was used for reliable  
757 quantification of perceptual dynamics. All instructions and stimuli were projected  
758 onto a screen (distance: 60 cm) inside the MEG chamber. The individual  
759 conditions are described as follows.

760 *Fixation.* Participants were asked to keep their eyes open and fixate a  
761 green fixation dot (radius =  $0.45^\circ$  visual angle) presented in the center of an  
762 otherwise gray screen. This is analogous to eyes-open measurements of  
763 “resting-state” activity widely used in the literature on intrinsic cortical activity  
764 fluctuations.

765 *Task-counting.* Participants viewed a seemingly rotating sphere giving rise  
766 to the kinetic depth effect [99,100]: spontaneous changes in the perceived  
767 rotation direction (Fig 1B). The stimulus subtended  $21^\circ$  of visual angle. It  
768 consisted of 1000 dots (500 black and 500 white dots, radius:  $0.18^\circ$  of visual  
769 angle) arranged on a circular aperture presented on a mean-luminance gray  
770 background, with the green fixation dot in the center. In order to minimize tracking  
771 eye movements, the sphere rotation was along the horizontal axis, either “forward”  
772 (towards the observer) or “backward” (away from the observer), and the dot  
773 density decreased along the horizontal axis towards the center of the stimulus.  
774 Participants were instructed to count the number of perceived changes in rotation

775 direction and report the total number of perceived transitions at the end of the run.  
776 Just like during Fixation, Task-counting minimized any external (sensory or  
777 motor) transients. Subjects silently counted the alternations in perceived rotation  
778 direction and verbally reported the total count after the end of the 10 minutes run.

779 *Task-pressing.* This condition was identical to Task-counting, except that  
780 participants were instructed to press and hold one of two buttons with their index  
781 finger to indicate the perceived rotation direction of the sphere. Thus, each  
782 perceptual alternation was accompanied by a motor response leading to change  
783 in the button state. This allowed for a more reliable quantification of participants'  
784 perceptual dynamics. On two sessions (Atomoxetine condition), button presses  
785 were not registered. Hence, the corresponding analyses were performed on 26  
786 participants.

787

## 788 **Data acquisition**

789 MEG was recorded using a whole-head CTF 275 MEG system (CTF Systems,  
790 Inc., Canada) at a sampling rate of 1200 Hz. In addition, eye movements and  
791 pupil diameter were recorded with an MEG-compatible EyeLink 1000 Long  
792 Range Mount system (SR Research, Osgoode, ON, Canada) at a sampling rate  
793 of 1000 Hz. In addition, electrocardiogram (ECG) as well as vertical, horizontal  
794 and radial EOG were acquired using Ag/AgCl electrodes (sampling rate 1200 Hz).

795

## 796 **Data analysis**

### 797 *Eye data*

798 Eye blinks were detected using the manufacturer's standard algorithm with  
799 default settings. Saccades and microsaccades were detected using the saccade  
800 detection algorithm described in [101], with a minimum saccade duration of 4



801 samples (= 4 ms) and a threshold velocity of 6. For 18 out of 28 participants, only  
802 horizontal eye movements were recorded.

803

#### 804 *EOG data*

805 EOG events (blinks and saccades) were extracted using semi-automatic artifact  
806 procedures as implemented in FieldTrip [102]. In short, EOG traces were  
807 bandpass filtered using a third-order butterworth filter (1 – 15 Hz) and the  
808 resulting signal was z-scored. All time points where the resulting signal exceeded  
809 a z-score of 4 were marked as an EOG event.

810

#### 811 *MEG data*

812 *Preprocessing.* First, all data were cleaned of strong transient muscle artifacts  
813 and squid jumps through visual inspection and manual as well as semi-automatic  
814 artifact rejection procedures, as implemented in the FieldTrip toolbox for MATLAB  
815 [102]. To this end, data segments contaminated by such artifacts (+/- 500 ms)  
816 were discarded from the data (across all channels). Subsequently, data were  
817 downsampled to 400 Hz split into low (2-40 Hz) and high (>40 Hz) frequency  
818 components, using a 4th order (low- or high-pass) Butterworth filter. Both signal  
819 components were separately submitted to independent component analysis [103]  
820 using the FastICA algorithm [104]. Artifactual components (eye blinks/movements,  
821 muscle artifacts, heartbeat and other extra-cranial artifacts) were identified based  
822 on three established criteria [105]: power spectrum, fluctuation in signal variance  
823 over time (in bins of 1s length), and topography. Artifact components were  
824 reconstructed and subtracted from the raw signal and low- and high frequencies  
825 were combined into a single data set. On average, 20 (+/- 14) artifact

826 components were identified for the low frequencies and 13 (+/- 7) artifactual  
827 components were identified for the high frequencies.

828

829 *Spectral analysis.* Sensor-level spectral estimates (power spectra and cross  
830 spectral density matrices) were computed by means of the multi taper method  
831 using a sequence of discrete prolate Slepian tapers [106]. For the power  
832 spectrum shown in Fig 1C, power spectra were computed using a window length  
833 of 5s and a frequency smoothing of 2 Hz, yielding 19 orthogonal tapers. The  
834 focus of this paper was on the fluctuations of the amplitude envelopes, rather  
835 than on the (oscillatory) fluctuations of the carrier signals *per se*. The temporal  
836 correlation structure of the amplitude envelope fluctuations of cortical activity  
837 seems similar across different carrier frequency bands [29]. We focused on  
838 amplitude envelope fluctuations in the alpha-band because (i) the cortical power  
839 spectra exhibited a clearly discernible alpha-peak, which robustly modulated with  
840 task, as expected from previous work [40] (Fig 1C); and (ii) the computational  
841 model used to study the effect of synaptic gain modulation on cortical activity  
842 fluctuations was tuned to produce alpha-band oscillations (see above and [49]).

843

844 *Source reconstruction: general approach.* The cleaned sensor level signals ( $N$   
845 sensors) were projected onto a grid consisting of  $M = 3000$  voxels covering gray  
846 matter of the entire brain (mean distance: 6.3 mm) using the exact low-resolution  
847 brain electromagnetic tomography (eLORETA; [107] method. The grid was  
848 constructed from the ICBM152 template [108], covering gray matter across the  
849 brain. The magnetic leadfield was computed, separately for each subject and  
850 session, using a single shell head model constructed from the individual  
851 structural MRI scans and the head position relative to the MEG sensors at the

852 beginning of the run [109]. In case no MRI was available (4 subjects), the  
853 leadfield was computed from a standard MNI template brain transformed to an  
854 estimate of the individual volume conductor using the measured fiducials (located  
855 at the nasion, the left and the right ear).

856 In order to depict the source-level results, we interpolated the voxel-level  
857 results onto the surface of the brain. Activations from structures distant to the  
858 surface are not shown and were exponentially attenuated.

859

860 *Source level estimates of amplitude envelopes and power.* For comparing  
861 amplitude envelope and power estimates between experimental conditions in  
862 source space we aimed to select a single direction of the spatial filter for each  
863 voxel across pharmacological conditions (i.e., MEG sessions), but separately for  
864 Fixation and Task-Counting conditions. The rationale was to avoid filter-induced  
865 biases in the comparisons between the pharmacological conditions, while  
866 allowing that external task drive might systematically change the dipole  
867 orientations.

868 To this end, we first computed the mean source-level cross-spectral  
869 density matrix  $C(r, f)$  for each frequency band,  $f$ , averaged across the three  
870 MEG sessions, as follows:

$$871 \quad C(r, f) = \frac{1}{3} \sum_{i=1}^3 \left( A_i^T(r) C_i(f) A_i(r) \right) \quad (1)$$

872 whereby  $i$  indicated the MEG session,  $C_i(f)$  was the (sensor-level) session- and  
873 frequency-specific cross-spectral density matrix and  $A_i$  is the spatial filter for  
874 session  $i$ . We then extracted the first eigenvector  $u_1(r, f)$  of the session-average  
875 matrix  $C(r, f)$ , by means of singular value decomposition, and computed the  
876 unbiased filter selective for the dominant dipole orientation,  $B_i(r, f)$ , as:

$$877 \quad B_i(r, f) = A_i(r) u_1(r, f) \quad (2)$$

878 This procedure ensures that, for each voxel, dipole orientation was  
879 chosen such that power is maximized. Please note that this filter was now  
880 frequency-specific, whereas the previous filters,  $A_i(r)$ , were not. To obtain  
881 instantaneous estimates of source-level amplitudes, the sensor-level signal for  
882 session  $i$ ,  $X_i(t)$ , was band-pass filtered (using a finite impulse response filter)  
883 and Hilbert-transformed, yielding a complex-valued signal  $H_i(f, t)$  for each  
884 frequency band. This signal was projected into source space through  
885 multiplication with the unbiased spatial filter,  $B_i(r, f)$ , and the absolute value was  
886 taken:

$$887 \text{Env}_i(r, f, t) = |(H_i(f, t) B_i(r, f))| \quad (3)$$

888 where  $\text{Env}_i(r, f, t)$  was the estimated amplitude envelope time course of source  
889 location  $r$  and frequency  $f$ . Next, for each session, unbiased source-level cross  
890 spectral density estimates were obtained from the sensor-level cross-spectral  
891 density matrix  $C_i(f)$  and the frequency-specific, unbiased spatial filter  $B_i(f)$ . The  
892 main diagonal of the resulting matrix contains source-level power estimates for all  
893 source locations:

$$894 S_i(f) = \text{diag}(B_i^T(f) C_i(f) B_i(f)) \quad (4)$$

895 These computations were repeated separately for the Task-counting and  
896 Fixation conditions, session by session. The differences in amplitude envelope  
897 fluctuations and power estimates between pharmacological and task conditions  
898 reported in this paper were robust with respect to the specifics of the analysis  
899 approach. In particular, we obtained qualitatively similar pharmacological effects  
900 in sensor space, as reported in an earlier conference abstract [110].

901

902 *Detrended fluctuation analysis.* The source-level amplitude envelopes  
903  $\text{Env}_i(r, f, t)$  were submitted to detrended fluctuation analysis [111,112] in order to

904 quantify long-range temporal correlations. Detrended fluctuation analysis  
905 quantifies the power law scaling of the fluctuation (root-mean-square) of a locally  
906 detrended, cumulative signal with time-window length. Different from the analysis  
907 of the more widely known autocorrelation function [30,77], detrended fluctuation  
908 analysis provides robust estimates of the autocorrelation structure for stationary  
909 and non-stationary time series. The procedure of the detrended fluctuation  
910 analysis is illustrated in Fig 2.

911 For simplicity, in the following, we re-write the amplitude envelope  
912  $Env_i(r, f, t)$  as  $x$  of length  $T$ . First, we computed the cumulative sum of the  
913 demeaned  $x$ , (Fig 2B):

$$914 \quad X(t) = \sum_{t'=1}^t (x(t') - \langle x \rangle) \quad (5)$$

915 where  $t'$  and  $t$  denote single time points up to length  $T$ . The cumulative signal  $X$   
916 was then cut into  $i = 1 \dots k$  segments  $Y_i$  of length  $N$  (overlap: 50%), where  $k =$   
917  $\text{floor}[(T - N)/(0.5 N)]$  (Fig 2B, top). Within each segment  $Y_i$  of equal length  $N$ ,  
918 the linear trend  $Y_{i\_trend}$  (least squares fit) was subtracted from  $Y_i$  (Fig 2B, bottom,  
919 blue vs. red lines), and the root-mean-square fluctuation for a given segment was  
920 computed as:

$$921 \quad F_{N\_i} = \left[ \frac{1}{N} \sum_{n=1}^N (Y_i(n) - Y_{i\_trend}(n))^2 \right]^{\frac{1}{2}} \quad (6)$$

922 where  $n$  indicates the individual time points. The fluctuation was computed for all  
923  $k$  segments of equal length  $N$  and the average fluctuation was obtained through:

$$924 \quad \langle F_N \rangle = \frac{1}{k} \sum_{i=1}^k F_{N\_i} \quad (7)$$

925 The procedure was repeated for 15 different logarithmically spaced window  
926 lengths  $N$ , ranging from 3 s to 50 s, which yields a fluctuation function (Fig 2C).  
927 As expected for scale-free time series (103), this fluctuation function follows a  
928 power-law of the form:

$$929 \quad \langle F_N \rangle \propto N^\alpha \quad (8)$$

930 The “scaling exponent”  $\alpha$  was computed through a linear regression fit in log-log  
931 coordinates (Fig 2C). The longest and shortest window lengths were chosen  
932 according to guidelines provided in [112].

933 A scaling exponent of  $\alpha \approx 0.5$  indicates a temporally uncorrelated (“white  
934 noise”) process. Scaling exponents between  $0.5 < \alpha < 1$  are indicative of scale-  
935 free behavior and long-range temporal correlations [112], whereas exponents of  
936  $\alpha < 0.5$  indicate long-range anti-correlations (“switching behavior”) and  $\alpha > 1$  are  
937 indicative of an unbounded process [112]. The scaling exponents for alpha-band  
938 MEG amplitude envelopes estimated in this study ranged (across experimental  
939 conditions, MEG sensors and participants) from 0.40 and 1.04, with 99.4% of all  
940 estimates in the range from 0.5 to 1. This is indicative of scale-free behavior and  
941 consistent with previous human MEG work [26–29,42,113].

942

943 *Relationship between measures of cortical variability.* Scale-free behavior of  
944 neural time series has also been quantified via analysis of the power spectrum  
945 [24,25]. There is a straightforward relationship between both approaches, which  
946 we explain below, to help appreciate our results in the context of these previous  
947 studies. The power spectrum of the amplitude envelope of cortical activity is  
948 typically well approximated by the power law  $p(f) \propto f^{-\beta}$ , where  $\beta$  is referred to  
949 as the power-law exponent (Fig 2D). For power-law decaying autocorrelations,  
950 the relationship between the power-law exponent  $\beta$  and the scaling exponent  $\alpha$   
951 (estimated through DFA) of a time series is:

952 
$$\beta = 2\alpha - 1 \quad (9)$$

953

954 *Analysis of ECG data.* ECG data were used to analyze two measures of  
955 peripheral autonomic activity: average heart rate and heart rate variability. For

956 both measures, we used an adaptive threshold to detect the R-peak of each  
957 QRS-complex in the ECG. Heart rate was then computed by dividing the total  
958 number of R-components by time. Heart rate variability was quantified by means  
959 of the detrended fluctuations analysis described for MEG above, but now applied  
960 to the time series of the intervals between successive R-peaks [28,29]. In line  
961 with the MEG analyses, we used windows ranging from 3 to 50 heartbeats  
962 (roughly corresponding to 3–50 s).

963

#### 964 *Statistical tests*

965 Statistical comparisons of all dependent variables between conditions were,  
966 unless stated otherwise, performed using paired t-tests.

967 Null effects are difficult to interpret using regular null hypothesis  
968 significance testing. The Bayes Factor addresses this problem by quantifying the  
969 strength of the support for the null hypothesis over the alternative hypothesis  
970 provided by the data, taking effect size into account. Wherever null effects were  
971 conceptually important, results obtained from a regular (paired) t-test [114] and  
972 Pearson correlations [115] were converted into corresponding Bayes Factors.

973 To map significant changes of scaling exponents  $\alpha$  across the brain, we  
974 computed a non-parametric permutation test based on spatial clustering  
975 [116,117]. This procedure has been shown to reliably control for Type I errors  
976 arising from multiple comparisons. First, a paired t-test was performed to identify  
977 voxels with significant changes (voxel with  $p < 0.05$ ). Subsequently, significant  
978 voxels are combined into clusters based on their spatial adjacency. Here, a voxel  
979 was only included into a cluster when it had at least two significant neighbors.  
980 Subsequently, the t-values of all voxels comprising a cluster were summed,  
981 which yields a cluster statistic (i.e., a cluster t-value) for each identified cluster.

982 Next, a randomization null distribution was computed using a permutation  
983 procedure ( $N = 10,000$  permutations). On each permutation, the experimental  
984 labels (i.e., the pharmacological conditions) were randomly re-assigned within  
985 participants and the aforementioned procedure was repeated. For each iteration,  
986 the maximum cluster statistic was determined and a distribution of maximum  
987 cluster statistics was generated. Eventually, the cluster statistic of all empirical  
988 clusters was compared to the values obtained from the permutation procedure.  
989 All voxels comprising a cluster with a cluster statistic smaller than 2.5% or larger  
990 than 97.5% of the permutation distribution were labeled significant, corresponding  
991 to a corrected threshold of  $\alpha = 0.05$  (two-sided).

992

### 993 **Model simulations**

994 To simulate the effects of synaptic gain modulation on cortical activity fluctuations,  
995 we extended a previously described computational model of a local cortical patch  
996 [49] by means of multiplicative modulation of synaptic gain. All features of the  
997 model were identical to those of the model by [49], unless stated otherwise. The  
998 model consisted of 2500 integrate-and-fire neurons (75% excitatory, 25%  
999 inhibitory) with local connectivity within a square (width = 7 units) and a  
1000 connection probability that decayed exponentially with distance (Fig 8A). The  
1001 dynamics of the units were governed by:

$$1002 \quad I_i = I_i + \sum_j N_{ij} W_{ij} S_j \quad (10)$$

$$1003 \quad \tau_i \frac{dI_i}{dt} = I_0 - I_i \quad (11)$$

1004 where subscripts  $i, j$  indicated different units,  $N_{ij}$  was a multiplicative gain factor,  
1005  $W_{ij}$  were the connection weights between two units, and  $S_j$  a binary spiking  
1006 vector representing whether unit  $j$  did or did not spike on the previous time step,  
1007 and  $I_0 = 0$ . For all simulations reported in this paper, we optimized the



1008 connection weights using Bonesa [118], a parameter tuning algorithm, such that  
1009 the network exhibited alpha-band oscillations, long-range temporal correlations,  
1010 and neuronal avalanches (see below). The optimized values for the connection  
1011 weights were  $W_{EE} = 0.0085$ ,  $W_{IE} = 0.0085$ ,  $W_{EI} = -0.569$  and  $W_{II} = -2$   
1012 whereby subscript  $E$  indicated excitatory, subscript  $I$  indicated inhibitory, and the  
1013 first and second subscript referred to the receiving and sending unit, respectively.

1014 On each time step ( $dt = 1$  ms),  $I_i$  was updated for each unit  $i$ , with the  
1015 summed input from all other (connected) units  $j$  and scaled by a time constant  
1016  $\tau_i = 9$  ms, which was the same for excitatory and inhibitory units. The probability  
1017 of a unit generating a spike output was given by:

$$1018 \quad P_{si} = P_{si} + I_i \quad (12)$$

$$1019 \quad \tau_P \frac{dP_{si}}{dt} = P_0 - P_{si} \quad (13)$$

1020 with the time constant for excitatory units  $\tau_P = 6$  ms and for inhibitory  $\tau_P = 12$  ms.

1021  $P_0$  was the background spiking probability, with  $P_0(exc.) = 0.000001$  [1/ms] and  
1022  $P_0(inh.) = 0$  [1/ms]. For each time step, it was determined whether a unit did or  
1023 did not spike. If it did, the probability of that unit spiking was reset to  
1024  $P_r(excitatory) = -2$  [1/ms] and  $P_r(inhibitory) = -20$  [1/ms].

1025 We used this model to analyze the dependency of two quantities on E/I  
1026 ratio: (i) the power-law scaling of the distributions of the sizes of neuronal  
1027 avalanches [50] estimated in terms of the kappa-index  $\kappa$  which quantifies the  
1028 difference between an empirically observed event size distribution and a  
1029 theoretical reference power-law distribution with a power-law exponent -1.5 [86],  
1030 and (ii) the scaling behavior (scaling exponent  $\alpha$ ) of the amplitude envelope  
1031 fluctuations of the model's local field potential. To this end, we summed the  
1032 activity across all (excitatory and inhibitory) neurons to obtain a proxy of the local  
1033 field potential. We band-pass filtered the local field potential in the alpha-band (8–

1034 12 Hz) and computed long-range temporal correlations in the alpha-band  
1035 amplitude envelopes following the procedure described above (see *Detrended*  
1036 *fluctuation analysis of MEG data*), using windows sizes ranging from 5 s to 30 s.

1037 In order to assess the influence of structural excitatory and inhibitory  
1038 connectivity on network dynamics (Figs 4D-F), we varied the percentage of units  
1039 (excitatory and inhibitory) a given excitatory or inhibitory unit connects to within a  
1040 local area (7 units x 7 units; Fig 8A). These percentages were varied  
1041 independently for excitatory and inhibitory units with a step size of 2.5%.

1042 The gain factor  $N_{ij}$  was the main difference to the model described by [49].  
1043 It was introduced to simulate the effects of neuromodulation on synaptic  
1044 interactions in the cortical network [37]. For this, we kept all the structural  
1045 parameters fixed (42.5% excitatory connectivity, 75% inhibitory connectivity;  
1046 small square in Figs 4D-F), in a range where the model exhibits both robust long-  
1047 range temporal correlations as well as neuronal avalanches. Note that any other  
1048 combination of parameters would yield similar results, as long as the model  
1049 exhibits these two phenomena. From the chosen starting point, we systematically  
1050 varied the synaptic gain factors, in two different ways. In the first version, we only  
1051 varied  $N_{EE}$  and  $N_{IE}$  to dynamically modulate the circuit's net E/I ratio (Fig 8B), in a  
1052 way consistent with recent modeling of the effects of E/I ratio on a cortical circuit  
1053 for perceptual decision-making [44]. In the second version, we varied  $N_{EE}$ ,  $N_{IE}$ ,  
1054 and  $N_{EI}$  (Fig S8A). Here,  $N_{EI}$  was modulated independently from  $N_{EE}$ , and  $N_{IE}$ ,  
1055 which in turn were co-modulated by the same factor.

1056 Per parameter combination, we ran 10 simulations, using the Brian2  
1057 spiking neural networks simulator [119]. Each simulation was run for 1000  
1058 seconds, with a random initialization of the network structure and the probabilistic  
1059 spiking.

1060

1061 **ACKNOWLEDGEMENTS**

1062 The authors thank Christiane Reissmann for help with the data collection, as well  
1063 as Sander Nieuwenhuis and Peter Murphy for helpful comments on the  
1064 manuscript. This work was supported by the German Research Foundation  
1065 (DFG): Heisenberg Professorship DO 1240/3-1 (to T.H.D.), and the Collaborative  
1066 Research Center SFB 936 (Projects A2/A3, A7, Z3, to A.K.E., T.H.D., G.N.,  
1067 respectively); by the BMBF (Project 161A130, to A.K.E.); by the EU (ERC-2010-  
1068 AdG-269716, to A.K.E.), by a grant from the state of Hamburg (CROSS FV25, to  
1069 A.K.E.); and by the Netherlands Organization for Scientific Research (NWO,  
1070 dossiernummer 406-15-256 to K.L.-H. and A.-E.A.)

1071

1072 **AUTHOR CONTRIBUTIONS**

1073 Conceptualization: T.P., A.K.E., and T.H.D.; Experimental design: T.P. and  
1074 T.H.D.; Model design: T.P., A-E.A., K.L-H., and T.H.D.; Investigation: T.P.;  
1075 Formal analysis: T.P.; Model simulations: A.-E.A.; Writing - Original draft: T.P.  
1076 and T.H.D.; Writing – Review & Editing: T.P., A-E.A., G.N., A.K.E., K.L-H., and  
1077 T.H.D. - Funding Acquisition: K.L-H., A.K.E., and T.H.D.; Supervision: G.N., K.L-  
1078 H., and T.H.D.

1079

1080 **COMPTETING FINANCIAL INTERESTS**

1081 The authors declare no competing financial interests.

1082

1083 **REFERENCES**

1084 1. Harris KD, Thiele A. Cortical state and attention. *Nat Rev Neurosci.*  
1085 2011;12: 509–523. doi:10.1038/nrn3084

*Pfeffer et al: Catecholamines Alter Cortical and Perceptual Variability*

- 1086 2. McGinley MJ, Vinck M, Reimer J, Batista-Brito R, Zagha E, Cadwell CR, et  
1087 al. Waking State: Rapid Variations Modulate Neural and Behavioral  
1088 Responses. *Neuron*. 2015;87: 1143–1161.  
1089 doi:10.1016/j.neuron.2015.09.012
- 1090 3. Guedj C, Monfardini E, Reynaud AJ, Farnè A, Meunier M, Hadj-Bouziane F.  
1091 Boosting Norepinephrine Transmission Triggers Flexible Reconfiguration  
1092 of Brain Networks at Rest. *Cereb Cortex*. 2016; doi:10.1093/cercor/bhw262
- 1093 4. van den Brink RL, Pfeffer T, Warren CM, Murphy PR, Tona K-D, van der  
1094 Wee NJA, et al. Catecholaminergic Neuromodulation Shapes Intrinsic MRI  
1095 Functional Connectivity in the Human Brain. *J Neurosci*. 2016;36: 7865–  
1096 7876. doi:10.1523/JNEUROSCI.0744-16.2016
- 1097 5. Aston-Jones G, Cohen JD. An integrative theory of locus coeruleus-  
1098 norepinephrine function: adaptive gain and optimal performance. *Annu Rev*  
1099 *Neurosci*. 2005;28: 403–450.  
1100 doi:10.1146/annurev.neuro.28.061604.135709
- 1101 6. Yu AJ, Dayan P. Uncertainty, neuromodulation, and attention. *Neuron*.  
1102 2005;46: 681–692. doi:10.1016/j.neuron.2005.04.026
- 1103 7. Nelson A, Mooney R. The Basal Forebrain and Motor Cortex Provide  
1104 Convergent yet Distinct Movement-Related Inputs to the Auditory Cortex.  
1105 *Neuron*. 2016;90: 635–48. doi:10.1016/j.neuron.2016.03.031
- 1106 8. de Gee JW, Colizoli O, Kloosterman NA, Knapen T, Nieuwenhuis S,  
1107 Donner TH. Dynamic modulation of decision biases by brainstem arousal  
1108 systems. *eLife*. 2017;6. doi:10.7554/eLife.23232
- 1109 9. Berridge CW. Noradrenergic modulation of arousal. *Brain Res Rev*.  
1110 2008;58: 1–17. doi:10.1016/j.brainresrev.2007.10.013
- 1111 10. Robbins TW, Arnsten AFT. The neuropsychopharmacology of fronto-  
1112 executive function: monoaminergic modulation. *Annu Rev Neurosci*.  
1113 2009;32: 267–287. doi:10.1146/annurev.neuro.051508.135535
- 1114 11. Lee S-H, Dan Y. Neuromodulation of brain states. *Neuron*. 2012;76: 209–  
1115 222.
- 1116 12. Froemke RC. Plasticity of Cortical Excitatory-Inhibitory Balance. *Annu Rev*  
1117 *Neurosci*. 2015;38: 195–219. doi:10.1146/annurev-neuro-071714-034002
- 1118 13. Glimcher PW. Indeterminacy in brain and behavior. *Annu Rev Psychol*.  
1119 2005;56: 25–56. doi:10.1146/annurev.psych.55.090902.141429
- 1120 14. Renart A, Machens CK. Variability in neural activity and behavior. *Curr*  
1121 *Opin Neurobiol*. 2014;25: 211–220. doi:10.1016/j.conb.2014.02.013
- 1122 15. Frank MJ, Doll BB, Oas-Terpstra J, Moreno F. Prefrontal and striatal  
1123 dopaminergic genes predict individual differences in exploration and  
1124 exploitation. *Nat Neurosci*. 2009;12: 1062–1068. doi:10.1038/nn.2342

*Pfeffer et al: Catecholamines Alter Cortical and Perceptual Variability*

- 1125 16. Moreno-Bote R, Knill DC, Pouget A. Bayesian sampling in visual  
1126 perception. *Proc Natl Acad Sci.* 2011;108: 12491–12496.  
1127 doi:10.1073/pnas.1101430108
- 1128 17. Pinto L, Goard MJ, Estandian D, Xu M, Kwan AC, Lee S-HH, et al. Fast  
1129 modulation of visual perception by basal forebrain cholinergic neurons.  
1130 *2013;16: 1857–63.* doi:10.1038/nn.3552
- 1131 18. Chen N, Sugihara H, Sur M. An acetylcholine-activated microcircuit drives  
1132 temporal dynamics of cortical activity. *Nat Neurosci.* 2015;18: 892–902.  
1133 doi:10.1038/nn.4002
- 1134 19. Minces V, Pinto L, Dan Y, Chiba AA. Cholinergic shaping of neural  
1135 correlations. *Proc Natl Acad Sci.* 2017;114: 5725–5730.  
1136 doi:10.1073/pnas.1621493114
- 1137 20. Polack P-O, Friedman J, Golshani P. Cellular mechanisms of brain state-  
1138 dependent gain modulation in visual cortex. *Nat Neurosci.* 2013;16: 1331–  
1139 1339. doi:10.1038/nn.3464
- 1140 21. Fu Y, Tucciarone JM, Espinosa JS, Sheng N, Darcy DP, Nicoll RA, et al. A  
1141 cortical circuit for gain control by behavioral state. *Cell.* 2014;156: 1139–  
1142 1152. doi:10.1016/j.cell.2014.01.050
- 1143 22. Fox MD, Raichle ME. Spontaneous fluctuations in brain activity observed  
1144 with functional magnetic resonance imaging. *Nat Rev Neurosci.* 2007;8:  
1145 700–711. doi:10.1038/nrn2201
- 1146 23. Deco G, Jirsa VK, McIntosh AR. Emerging concepts for the dynamical  
1147 organization of resting-state activity in the brain. *Nat Rev Neurosci.*  
1148 2011;12: 43–56. doi:10.1038/nrn2961
- 1149 24. Miller KJ, Sorensen LB, Ojemann JG, den Nijs M. Power-law scaling in the  
1150 brain surface electric potential. *PLoS Comput Biol.* 2009;5: e1000609.  
1151 doi:10.1371/journal.pcbi.1000609
- 1152 25. He BJ, Zempel JM, Snyder AZ, Raichle ME. The temporal structures and  
1153 functional significance of scale-free brain activity. *Neuron.* 2010;66: 353–  
1154 369. doi:10.1016/j.neuron.2010.04.020
- 1155 26. Linkenkaer-Hansen K, Nikouline VV, Palva JM, Ilmoniemi RJ. Long-range  
1156 temporal correlations and scaling behavior in human brain oscillations. *J*  
1157 *Neurosci Off J Soc Neurosci.* 2001;21: 1370–1377.
- 1158 27. He BJ. Scale-Free Properties of the Functional Magnetic Resonance  
1159 Imaging Signal during Rest and Task. *J Neurosci.* 2011;31: 13786–13795.  
1160 doi:10.1523/JNEUROSCI.2111-11.2011
- 1161 28. Palva JM, Zhigalov A, Hirvonen J, Korhonen O, Linkenkaer-Hansen K,  
1162 Palva S. Neuronal long-range temporal correlations and avalanche  
1163 dynamics are correlated with behavioral scaling laws. *Proc Natl Acad Sci.*  
1164 2013;110: 3585–3590. doi:10.1073/pnas.1216855110

- 1165 29. Zhigalov A, Arnulfo G, Nobili L, Palva S, Palva JM. Relationship of fast-  
1166 and slow-timescale neuronal dynamics in human MEG and SEEG. *J*  
1167 *Neurosci Off J Soc Neurosci.* 2015;35: 5385–5396.  
1168 doi:10.1523/JNEUROSCI.4880-14.2015
- 1169 30. Honey CJ, Thesen T, Donner TH, Silbert LJ, Carlson CE, Devinsky O, et al.  
1170 Slow Cortical Dynamics and the Accumulation of Information over Long  
1171 Timescales. *Neuron.* 2012;76: 423–434. doi:10.1016/j.neuron.2012.08.011
- 1172 31. Donner TH, Sagi D, Bonnef YS, Heeger DJ. Retinotopic Patterns of  
1173 Correlated Fluctuations in Visual Cortex Reflect the Dynamics of  
1174 Spontaneous Perceptual Suppression. *J Neurosci.* 2013;33: 2188–2198.  
1175 doi:10.1523/JNEUROSCI.3388-12.2013
- 1176 32. Chaudhuri R, Knoblauch K, Gariel M-A, Kennedy H, Wang X-J. A Large-  
1177 Scale Circuit Mechanism for Hierarchical Dynamical Processing in the  
1178 Primate Cortex. *Neuron.* 2015;88: 419–431.  
1179 doi:10.1016/j.neuron.2015.09.008
- 1180 33. Moreno-Bote R, Rinzel J, Rubin N. Noise-induced alternations in an  
1181 attractor network model of perceptual bistability. *J Neurophysiol.* 2007;98:  
1182 1125–1139. doi:10.1152/jn.00116.2007
- 1183 34. Noest AJ, van Ee R, Nijs MM, van Wezel RJA. Percept-choice sequences  
1184 driven by interrupted ambiguous stimuli: A low-level neural model. *J Vis.*  
1185 2007;7: 10. doi:10.1167/7.8.10
- 1186 35. Deco G, Romo R. The role of fluctuations in perception. *Trends Neurosci.*  
1187 2008;31: 591–598. doi:10.1016/j.tins.2008.08.007
- 1188 36. van Loon AM, Knapen T, Scholte HS, St. John-Saaltink E, Donner TH,  
1189 Lamme VAF. GABA Shapes the Dynamics of Bistable Perception. *Curr*  
1190 *Biol.* 2013;23: 823–827. doi:10.1016/j.cub.2013.03.067
- 1191 37. Eckhoff P, Wong-Lin KF, Holmes P. Optimality and Robustness of a  
1192 Biophysical Decision-Making Model under Norepinephrine Modulation. *J*  
1193 *Neurosci.* 2009;29: 4301–4311. doi:10.1523/JNEUROSCI.5024-08.2009
- 1194 38. Parker AJ, Krug K, Cumming BG. Neuronal activity and its links with the  
1195 perception of multi-stable figures. *Philos Trans R Soc Lond B Biol Sci.*  
1196 2002;357: 1053–1062. doi:10.1098/rstb.2002.1112
- 1197 39. Brouwer GJ, van Ee R. Visual cortex allows prediction of perceptual states  
1198 during ambiguous structure-from-motion. *J Neurosci Off J Soc Neurosci.*  
1199 2007;27: 1015–1023. doi:10.1523/JNEUROSCI.4593-06.2007
- 1200 40. Donner TH, Siegel M. A framework for local cortical oscillation patterns.  
1201 *Trends Cogn Sci.* 2011;15: 191–199. doi:10.1016/j.tics.2011.03.007
- 1202 41. Linkenkaer-Hansen K, Smit DJA, Barkil A, van Beijsterveldt TEM,  
1203 Brussaard AB, Boomsma DI, et al. Genetic contributions to long-range  
1204 temporal correlations in ongoing oscillations. *J Neurosci Off J Soc*  
1205 *Neurosci.* 2007;27: 13882–13889. doi:10.1523/JNEUROSCI.3083-07.2007

*Pfeffer et al: Catecholamines Alter Cortical and Perceptual Variability*

- 1206 42. Linkenkaer-Hansen K, Nikulin VV, Palva S, Ilmoniemi RJ, Palva JM.  
1207 Prestimulus oscillations enhance psychophysical performance in humans.  
1208 J Neurosci Off J Soc Neurosci. 2004;24: 10186–10190.  
1209 doi:10.1523/JNEUROSCI.2584-04.2004
- 1210 43. Bauer M, Kluge C, Bach D, Bradbury D, Heinze HJ, Dolan RJ, et al.  
1211 Cholinergic enhancement of visual attention and neural oscillations in the  
1212 human brain. Curr Biol CB. 2012;22: 397–402.  
1213 doi:10.1016/j.cub.2012.01.022
- 1214 44. Lam NH, Borduqui T, Hallak J, Roque AC, Anticevic A, Krystal JH, et al.  
1215 Effects of Altered Excitation-Inhibition Balance on Decision Making in a  
1216 Cortical Circuit Model. bioRxiv. 2017; doi:http://dx.doi.org/10.1101/100347
- 1217 45. van Vreeswijk C, Sompolinsky H. Chaos in neuronal networks with  
1218 balanced excitatory and inhibitory activity. Science. 1996;274: 1724–1726.
- 1219 46. Shadlen MN, Newsome WT. The variable discharge of cortical neurons:  
1220 implications for connectivity, computation, and information coding. J  
1221 Neurosci Off J Soc Neurosci. 1998;18: 3870–3896.
- 1222 47. Okun M, Lampl I. Balance of excitation and inhibition. Scholarpedia.  
1223 2009;4: 7467. doi:10.4249/scholarpedia.7467
- 1224 48. Isaacson JS, Scanziani M. How inhibition shapes cortical activity. Neuron.  
1225 2011;72: 231–243. doi:10.1016/j.neuron.2011.09.027
- 1226 49. Poil S-S, Hardstone R, Mansvelder HD, Linkenkaer-Hansen K. Critical-  
1227 State Dynamics of Avalanches and Oscillations Jointly Emerge from  
1228 Balanced Excitation/Inhibition in Neuronal Networks. J Neurosci. 2012;32:  
1229 9817–9823. doi:10.1523/JNEUROSCI.5990-11.2012
- 1230 50. Beggs JM, Plenz D. Neuronal avalanches in neocortical circuits. J  
1231 Neurosci Off J Soc Neurosci. 2003;23: 11167–11177.
- 1232 51. Servan-Schreiber D, Printz H, Cohen J. A network model of catecholamine  
1233 effects: gain, signal-to-noise ratio, and behavior. Science. 1990;249: 892–  
1234 895. doi:10.1126/science.2392679
- 1235 52. Haider B, Häusser M, Carandini M. Inhibition dominates sensory  
1236 responses in the awake cortex. Nature. 2013;493: 97–100.  
1237 doi:10.1038/nature11665
- 1238 53. Adesnik H. Synaptic Mechanisms of Feature Coding in the Visual Cortex of  
1239 Awake Mice. Neuron. 2017;95: 1147–1159.e4.  
1240 doi:10.1016/j.neuron.2017.08.014
- 1241 54. Sara SJ. The locus coeruleus and noradrenergic modulation of cognition.  
1242 Nat Rev Neurosci. 2009;10: 211–223. doi:10.1038/nrn2573
- 1243 55. Morrison JH, Foote SL. Noradrenergic and serotonergic innervation of  
1244 cortical, thalamic, and tectal visual structures in Old and New World  
1245 monkeys. J Comp Neurol. 1986;243: 117–138.  
1246 doi:10.1002/cne.902430110

*Pfeffer et al: Catecholamines Alter Cortical and Perceptual Variability*

- 1247 56. Pennartz CM. The ascending neuromodulatory systems in learning by  
1248 reinforcement: comparing computational conjectures with experimental  
1249 findings. *Brain Res Brain Res Rev.* 1995;21: 219–245.
- 1250 57. Roelfsema PR, van Ooyen A, Watanabe T. Perceptual learning rules  
1251 based on reinforcers and attention. *Trends Cogn Sci.* 2010;14: 64–71.  
1252 doi:10.1016/j.tics.2009.11.005
- 1253 58. Salgado H, Treviño M, Atzori M. Layer- and area-specific actions of  
1254 norepinephrine on cortical synaptic transmission. *Brain Res.* 2016;1641:  
1255 163–176. doi:10.1016/j.brainres.2016.01.033
- 1256 59. Ramos BP, Arnsten AFT. Adrenergic pharmacology and cognition: focus  
1257 on the prefrontal cortex. *Pharmacol Ther.* 2007;113: 523–536.  
1258 doi:10.1016/j.pharmthera.2006.11.006
- 1259 60. Crochet S, Poulet JFA, Kremer Y, Petersen CCH. Synaptic Mechanisms  
1260 Underlying Sparse Coding of Active Touch. *Neuron.* 2011;69: 1160–1175.  
1261 doi:10.1016/j.neuron.2011.02.022
- 1262 61. Zhou M, Liang F, Xiong XR, Li L, Li H, Xiao Z, et al. Scaling down of  
1263 balanced excitation and inhibition by active behavioral states in auditory  
1264 cortex. *Nat Neurosci.* 2014;17: 841–850. doi:10.1038/nn.3701
- 1265 62. Swadlow HA. Thalamocortical control of feed-forward inhibition in awake  
1266 somatosensory “barrel” cortex. *Philos Trans R Soc B Biol Sci.* 2002;357:  
1267 1717–1727. doi:10.1098/rstb.2002.1156
- 1268 63. Kepecs A, Fishell G. Interneuron cell types are fit to function. *Nature.*  
1269 2014;505: 318–326. doi:10.1038/nature12983
- 1270 64. Ponce-Alvarez A, He BJ, Hagmann P, Deco G. Task-Driven Activity  
1271 Reduces the Cortical Activity Space of the Brain: Experiment and Whole-  
1272 Brain Modeling. Graham LJ, editor. *PLOS Comput Biol.* 2015;11:  
1273 e1004445. doi:10.1371/journal.pcbi.1004445
- 1274 65. Froemke RC, Merzenich MM, Schreiner CE. A synaptic memory trace for  
1275 cortical receptive field plasticity. *Nature.* 2007;450: 425–429.  
1276 doi:10.1038/nature06289
- 1277 66. Martins ARO, Froemke RC. Coordinated forms of noradrenergic plasticity  
1278 in the locus coeruleus and primary auditory cortex. *Nat Neurosci.* 2015;18:  
1279 1483–1492. doi:10.1038/nn.4090
- 1280 67. Murphy BK, Miller KD. Multiplicative gain changes are induced by  
1281 excitation or inhibition alone. *J Neurosci.* 2003;23: 10040–10051.
- 1282 68. Denève S, Machens CK. Efficient codes and balanced networks. *Nat*  
1283 *Neurosci.* 2016;19: 375–382. doi:10.1038/nn.4243
- 1284 69. Wang X-J. Decision making in recurrent neuronal circuits. *Neuron.*  
1285 2008;60: 215–234. doi:10.1016/j.neuron.2008.09.034



*Pfeffer et al: Catecholamines Alter Cortical and Perceptual Variability*

- 1286 70. Yizhar O, Fenno LE, Prigge M, Schneider F, Davidson TJ, O'Shea DJ, et al.  
1287 Neocortical excitation/inhibition balance in information processing and  
1288 social dysfunction. *Nature*. 2011;477: 171–178. doi:10.1038/nature10360
- 1289 71. Lisman J. Excitation, inhibition, local oscillations, or large-scale loops: what  
1290 causes the symptoms of schizophrenia? *Curr Opin Neurobiol*. 2012;22:  
1291 537–544. doi:10.1016/j.conb.2011.10.018
- 1292 72. Nelson SB, Valakh V. Excitatory/Inhibitory Balance and Circuit  
1293 Homeostasis in Autism Spectrum Disorders. *Neuron*. 2015;87: 684–698.  
1294 doi:10.1016/j.neuron.2015.07.033
- 1295 73. Fuchs T, Jefferson SJ, Hooper A, Yee P-H, Maguire J, Luscher B.  
1296 Disinhibition of somatostatin-positive GABAergic interneurons results in an  
1297 anxiolytic and antidepressant-like brain state. *Mol Psychiatry*. 2017;22:  
1298 920–930. doi:10.1038/mp.2016.188
- 1299 74. Eggermann E, Kremer Y, Crochet S, Petersen CCH. Cholinergic Signals in  
1300 Mouse Barrel Cortex during Active Whisker Sensing. *Cell Rep*. 2014;9:  
1301 1654–1660. doi:10.1016/j.celrep.2014.11.005
- 1302 75. Carter OL, Pettigrew JD, Hasler F, Wallis GM, Liu GB, Hell D, et al.  
1303 Modulating the rate and rhythmicity of perceptual rivalry alternations with  
1304 the mixed 5-HT<sub>2A</sub> and 5-HT<sub>1A</sub> agonist psilocybin. *Neuropsychopharmacol*  
1305 *Off Publ Am Coll Neuropsychopharmacol*. 2005;30: 1154–1162.  
1306 doi:10.1038/sj.npp.1300621
- 1307 76. Noudoost B, Moore T. Control of visual cortical signals by prefrontal  
1308 dopamine. *Nature*. 2011;474: 372–375. doi:10.1038/nature09995
- 1309 77. Murray JD, Bernacchia A, Freedman DJ, Romo R, Wallis JD, Cai X, et al.  
1310 A hierarchy of intrinsic timescales across primate cortex. *Nat Neurosci*.  
1311 2014;17: 1661–1663. doi:10.1038/nn.3862
- 1312 78. Wang X-J. Synaptic reverberation underlying mnemonic persistent activity.  
1313 2001;24. doi:10.1016/s0166-2236(00)01868-3
- 1314 79. Wang X-JJ. Probabilistic decision making by slow reverberation in cortical  
1315 circuits. 2002;36: 955–68. doi:10.1016/s0896-6273(02)01092-9
- 1316 80. Beggs JM. The criticality hypothesis: how local cortical networks might  
1317 optimize information processing. *Philos Transact A Math Phys Eng Sci*.  
1318 2008;366: 329–343. doi:10.1098/rsta.2007.2092
- 1319 81. Bak P, Tang C, Wiesenfeld K. Self-organized criticality: An explanation of  
1320 the 1/f noise. *Phys Rev Lett*. 1987;59: 381–384.  
1321 doi:10.1103/PhysRevLett.59.381
- 1322 82. Bak P. How nature works: the science of self-organized criticality [Internet].  
1323 New York, NY, USA: Copernicus; 1996. Available:  
1324 <http://catalog.hathitrust.org/api/volumes/oclc/34623628.html>
- 1325 83. Chialvo DR. Emergent complex neural dynamics. *Nat Phys*. 2010;6: 744–  
1326 750. doi:10.1038/nphys1803

*Pfeffer et al: Catecholamines Alter Cortical and Perceptual Variability*

- 1327 84. Hesse J, Gross T. Self-organized criticality as a fundamental property of  
1328 neural systems. *Front Syst Neurosci.* 2014;8: 166.  
1329 doi:10.3389/fnsys.2014.00166
- 1330 85. Kinouchi O, Copelli M. Optimal dynamical range of excitable networks at  
1331 criticality. *Nat Phys.* 2006;2: 348–351. doi:10.1038/nphys289
- 1332 86. Shew WL, Yang H, Petermann T, Roy R, Plenz D. Neuronal avalanches  
1333 imply maximum dynamic range in cortical networks at criticality. *J Neurosci*  
1334 *Off J Soc Neurosci.* 2009;29: 15595–15600.  
1335 doi:10.1523/JNEUROSCI.3864-09.2009
- 1336 87. Shew W, Yang H, Yu S, Roy R. Information capacity and transmission are  
1337 maximized in balanced cortical networks with neuronal avalanches. *J ....*  
1338 2011;
- 1339 88. Shriki O, Yellin D. Optimal Information Representation and Criticality in an  
1340 Adaptive Sensory Recurrent Neuronal Network. *PLoS Comput Biol.*  
1341 2016;12: e1004698. doi:10.1371/journal.pcbi.1004698
- 1342 89. Priesemann V, Valderrama M, Wibral M, Le Van Quyen M. Neuronal  
1343 avalanches differ from wakefulness to deep sleep--evidence from  
1344 intracranial depth recordings in humans. *PLoS Comput Biol.* 2013;9:  
1345 e1002985. doi:10.1371/journal.pcbi.1002985
- 1346 90. Arviv O, Goldstein A, Shriki O. Near-Critical Dynamics in Stimulus-Evoked  
1347 Activity of the Human Brain and Its Relation to Spontaneous Resting-State  
1348 Activity. *J Neurosci Off J Soc Neurosci.* 2015;35: 13927–13942.  
1349 doi:10.1523/JNEUROSCI.0477-15.2015
- 1350 91. Fagerholm ED, Lorenz R, Scott G, Dinov M, Hellyer PJ, Mirzaei N, et al.  
1351 Cascades and Cognitive State: Focused Attention Incurs Subcritical  
1352 Dynamics. *J Neurosci.* 2015;35: 4626–4634.  
1353 doi:10.1523/JNEUROSCI.3694-14.2015
- 1354 92. Shew WL, Clawson WP, Pobst J, Karimipناه Y, Wright NC, Wessel R.  
1355 Adaptation to sensory input tunes visual cortex to criticality. *Nat Phys.*  
1356 2015;11: 659–663. doi:10.1038/nphys3370
- 1357 93. Krug K, Cicmil N, Parker AJ, Cumming BG. A Causal Role for V5/MT  
1358 Neurons Coding Motion-Disparity Conjunctions in Resolving Perceptual  
1359 Ambiguity. 2013;23: 1454–9. doi:10.1016/j.cub.2013.06.023
- 1360 94. Bollimunta A, Mo J, Schroeder CE, Ding M. Neuronal mechanisms and  
1361 attentional modulation of corticothalamic  $\alpha$  oscillations. *J Neurosci Off J*  
1362 *Soc Neurosci.* 2011;31: 4935–4943. doi:10.1523/JNEUROSCI.5580-  
1363 10.2011
- 1364 95. Bymaster FP, Katner JS, Nelson DL, Hemrick-Luecke SK, Threlkeld PG,  
1365 Heiligenstein JH, et al. Atomoxetine increases extracellular levels of  
1366 norepinephrine and dopamine in prefrontal cortex of rat: a potential  
1367 mechanism for efficacy in attention deficit/hyperactivity disorder.

- 1368 Neuropsychopharmacol Off Publ Am Coll Neuropsychopharmacol.  
1369 2002;27: 699–711. doi:10.1016/S0893-133X(02)00346-9
- 1370 96. Ding Y-S, Naganawa M, Gallezot J-D, Nabulsi N, Lin S-F, Ropchan J, et al.  
1371 Clinical doses of atomoxetine significantly occupy both norepinephrine and  
1372 serotonin transports: Implications on treatment of depression and ADHD.  
1373 *NeuroImage*. 2014;86: 164–171. doi:10.1016/j.neuroimage.2013.08.001
- 1374 97. Tiseo, Rogers, Friedhoff. Pharmacokinetic and pharmacodynamic profile of  
1375 donepezil HCl following evening administration: Evening administration of  
1376 donepezil HCl. *Br J Clin Pharmacol*. 1998;46: 13–18. doi:10.1046/j.1365-  
1377 2125.1998.0460s1013.x
- 1378 98. Sauer J-M, Ring BJ, Witcher JW. Clinical pharmacokinetics of atomoxetine.  
1379 *Clin Pharmacokinet*. 2005;44: 571–590. doi:10.2165/00003088-  
1380 200544060-00002
- 1381 99. Wallach H, O’connell DN. The kinetic depth effect. *J Exp Psychol*. 1953;45:  
1382 205–217.
- 1383 100. Sperling G, Doshier BA, Landy MS. How to study the kinetic depth effect  
1384 experimentally. *J Exp Psychol Hum Percept Perform*. 1990;16: 445–450.
- 1385 101. Engbert R, Kliegl R. Microsaccades uncover the orientation of covert  
1386 attention. *Vision Res*. 2003;43: 1035–1045.
- 1387 102. Oostenveld R, Fries P, Maris E, Schoffelen J-M. FieldTrip: Open source  
1388 software for advanced analysis of MEG, EEG, and invasive  
1389 electrophysiological data. *Comput Intell Neurosci*. 2011;2011: 156869.  
1390 doi:10.1155/2011/156869
- 1391 103. Bell AJ, Sejnowski TJ. An information-maximization approach to blind  
1392 separation and blind deconvolution. *Neural Comput*. 1995;7: 1129–1159.
- 1393 104. Hyvarinen A. Fast and robust fixed-point algorithms for independent  
1394 component analysis. *IEEE Trans Neural Netw*. 1999;10: 626–634.  
1395 doi:10.1109/72.761722
- 1396 105. Hipp JF, Siegel M. Dissociating neuronal gamma-band activity from cranial  
1397 and ocular muscle activity in EEG. *Front Hum Neurosci*. 2013;7:  
1398 doi:10.3389/fnhum.2013.00338
- 1399 106. Mitra PP, Pesaran B. Analysis of dynamic brain imaging data. *Biophys J*.  
1400 1999;76: 691–708. doi:10.1016/S0006-3495(99)77236-X
- 1401 107. Pascual-Marqui RD, Lehmann D, Koukkou M, Kochi K, Anderer P, Saletu  
1402 B, et al. Assessing interactions in the brain with exact low-resolution  
1403 electromagnetic tomography. *Philos Transact A Math Phys Eng Sci*.  
1404 2011;369: 3768–3784. doi:10.1098/rsta.2011.0081
- 1405 108. Fonov V, Evans AC, Botteron K, Almli CR, McKinsty RC, Collins DL, et al.  
1406 Unbiased average age-appropriate atlases for pediatric studies.  
1407 *NeuroImage*. 2011;54: 313–327. doi:10.1016/j.neuroimage.2010.07.033

*Pfeffer et al: Catecholamines Alter Cortical and Perceptual Variability*

- 1408 109. Nolte G. The magnetic lead field theorem in the quasi-static approximation  
1409 and its use for magnetoencephalography forward calculation in realistic  
1410 volume conductors. *Phys Med Biol.* 2003;48: 3637–3652.
- 1411 110. Pfeffer T, Linkenkaer-Hansen K, Avramiea A-E, Engel AK, Donner TH.  
1412 Noradrenaline increases long-range temporal correlations of neuronal  
1413 alpha oscillations in the human cortex. 2015. p. 393.27.
- 1414 111. Peng CK, Buldyrev SV, Havlin S, Simons M, Stanley HE, Goldberger AL.  
1415 Mosaic organization of DNA nucleotides. *Phys Rev E Stat Phys Plasmas*  
1416 *Fluids Relat Interdiscip Top.* 1994;49: 1685–1689.
- 1417 112. Hardstone R, Poil S-S, Schiavone G, Jansen R, Nikulin VV, Mansvelder  
1418 HD, et al. Detrended Fluctuation Analysis: A Scale-Free View on Neuronal  
1419 Oscillations. *Front Physiol.* 2012;3. doi:10.3389/fphys.2012.00450
- 1420 113. Montez T, Poil S-S, Jones BF, Manshanden I, Verbunt JPA, van Dijk BW,  
1421 et al. Altered temporal correlations in parietal alpha and prefrontal theta  
1422 oscillations in early-stage Alzheimer disease. *Proc Natl Acad Sci.*  
1423 2009;106: 1614–1619. doi:10.1073/pnas.0811699106
- 1424 114. Rouder JN, Speckman PL, Sun D, Morey RD, Iverson G. Bayesian t tests  
1425 for accepting and rejecting the null hypothesis. *Psychon Bull Rev.* 2009;16:  
1426 225–237. doi:10.3758/PBR.16.2.225
- 1427 115. Wetzels R, Wagenmakers E-J. A default Bayesian hypothesis test for  
1428 correlations and partial correlations. *Psychon Bull Rev.* 2012;19: 1057–  
1429 1064. doi:10.3758/s13423-012-0295-x
- 1430 116. Nichols TE, Holmes AP. Nonparametric permutation tests for functional  
1431 neuroimaging: A primer with examples. *Hum Brain Mapp.* 2002;15: 1–25.  
1432 doi:10.1002/hbm.1058
- 1433 117. Maris E, Oostenveld R. Nonparametric statistical testing of EEG- and  
1434 MEG-data. *J Neurosci Methods.* 2007;164: 177–190.  
1435 doi:10.1016/j.jneumeth.2007.03.024
- 1436 118. Eiben AE, Smit SK. Parameter tuning for configuring and analyzing  
1437 evolutionary algorithms. *Swarm Evol Comput.* 2011;1: 19–31.  
1438 doi:10.1016/j.swevo.2011.02.001
- 1439 119. Goodman DF, Stimberg M, Yger P, Brette R. Brian 2: neural simulations on  
1440 a variety of computational hardware. *BMC Neurosci.* 2014;15: P199.  
1441 doi:10.1186/1471-2202-15-S1-P199

1442

## SUPPLEMENTAL MATERIAL

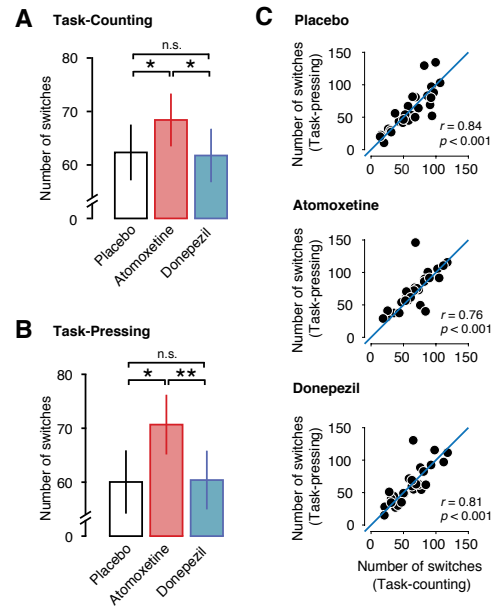

**S1 Fig.** Similar Atomoxetine-related effects in both Task-counting and Task-resting conditions. **(A)** Number of perceptual alternations reported by the subjects per 10 min run for Task-counting condition. **(B)** Same as (A), but for Task-pressing condition. **(C)** Relation between the number of reported alternations during Task-counting (x-axis) and Task-pressing (y-axis). The blue line depicts a linear relation with slope 1 as a reference. Two-sided t-tests and Pearson correlations (N=28).

Pfeffer et al: Catecholamines Alter Cortical and Perceptual Variability

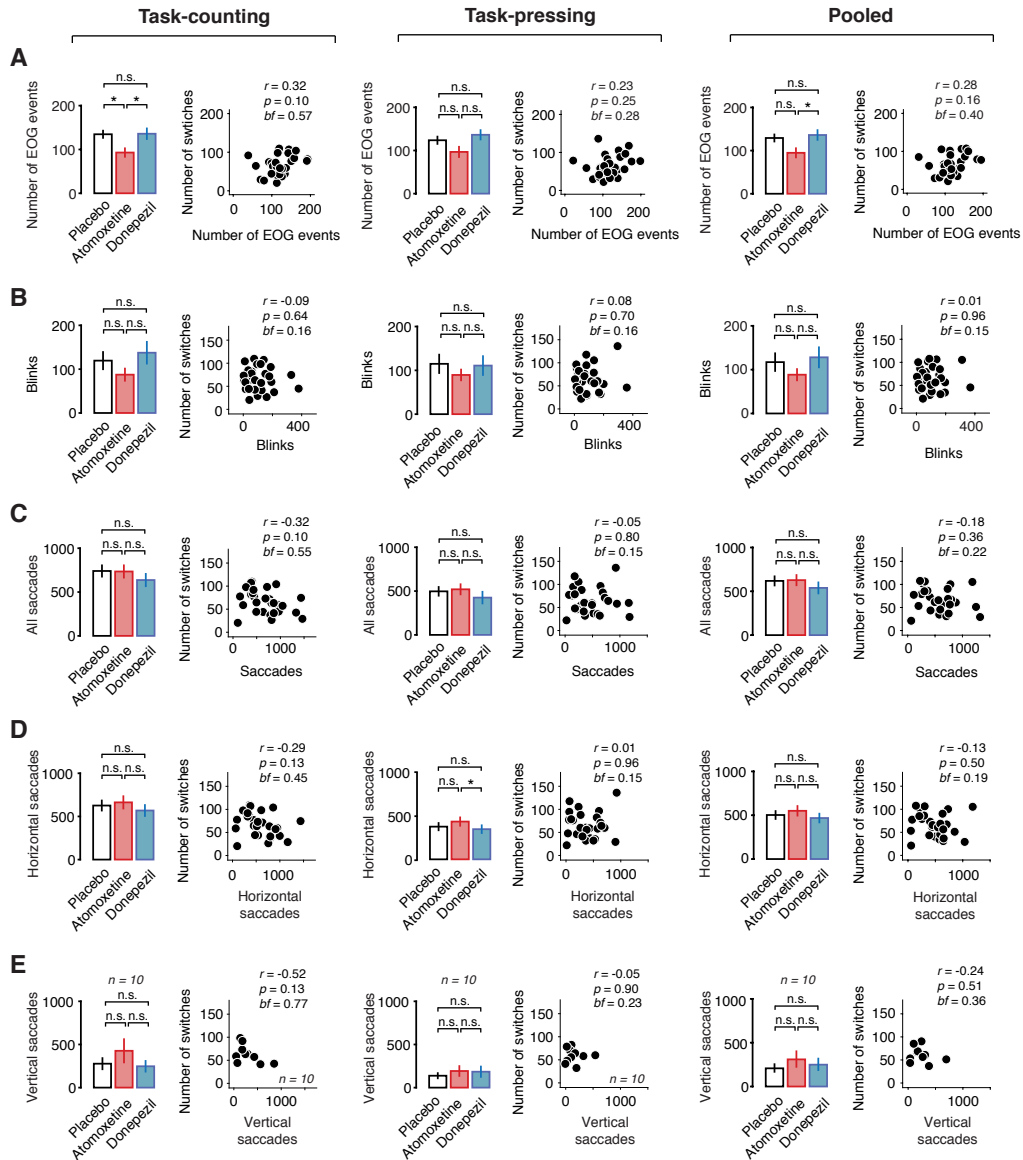

**S2 Fig.** Change in perceptual alternation rate is not due to change in blinks or fixational eye movements. **(A)** Number of EOG events for during Task-counting (left), Task-pressing (middle) and pooled across both conditions (right). Scatter plots depict the relation between the number of EOG events (x-axis) and the number of reported perceptual alternations (y-axis). **(B)** Same as (A), but for the number of detected eye blinks. **(C)** Same as (A) and (B), but for the number of saccades (horizontal and vertical). **(D)** Same as (C), but for horizontal saccades only. **(E)** Same as (D), but for vertical saccades only. Two-sided t-tests and Pearson correlations (N=28). BF, Bayes factor. These control analyses demonstrate that the change in perceptual dynamics under Atomoxetine is not explained by changes in ocular parameters.

Pfeffer et al: Catecholamines Alter Cortical and Perceptual Variability

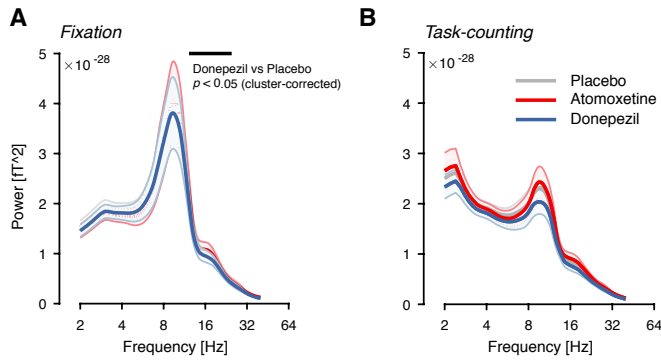

**S3 Fig.** Power spectra, averaged across all MEG sensors, during Fixation (**A**) and Task-counting. (**B**) Black bar denotes significant differences assessed using a paired cluster-based permutation test ( $p < 0.05$ ).

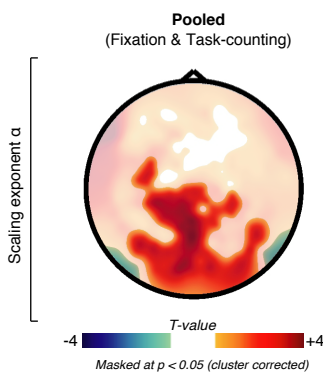

**S4 Fig.** Sensor-level scaling exponent for the Atomoxetine condition, pooled across Fixation and Task-counting conditions. Thresholded at  $p = 0.05$ , two-sided cluster-based permutation test.

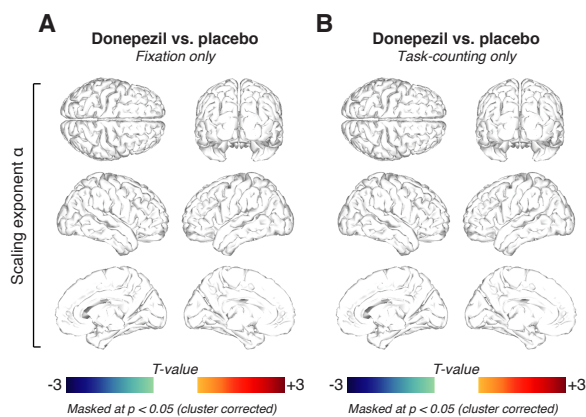

**S5 Fig.** No Donepezil-related changes in scaling exponent in neither behavioral contexts. (**A**) Spatial distribution of Donepezil-induced changes in scaling exponent  $\alpha$  during Fixation, thresholded at  $p = 0.05$  (two-sided cluster-based permutation test). (**B**) As (A), but for Task-counting.

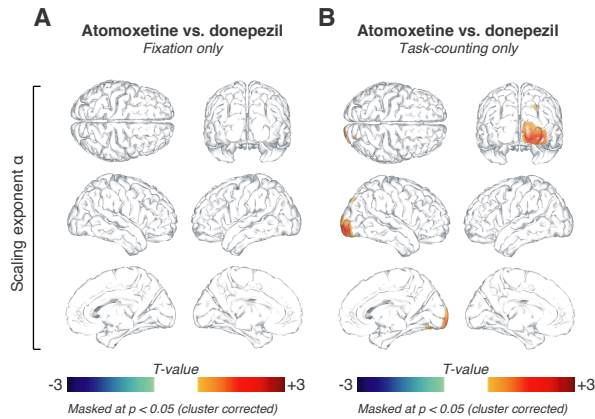

**S6 Fig.** Direct comparison of the drug effects on scaling exponent  $\alpha$ . **(A)** Comparison of the effects of the two drugs conditions (i.e., Atomoxetine vs. Donepezil) during Fixation. **(B)** Same as (A), but during Task-counting. All thresholds at  $p = 0.05$ , cluster-based two-sided permutation tests ( $N=28$ ).

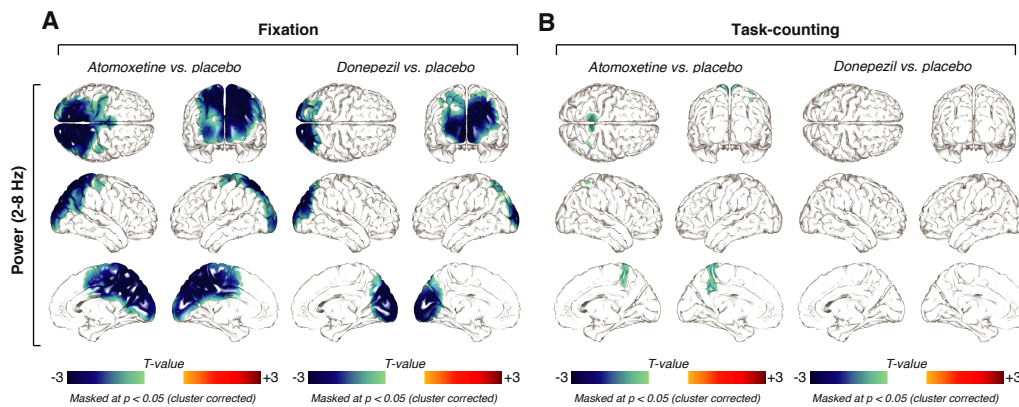

**S7 Fig.** Similar effects of Atomoxetine and Donepezil on low-frequency (2-8 Hz) power. **(A)** Spatial distribution of drug-related low-frequency power changes during Fixation, thresholded at  $p = 0.05$  (two-sided cluster-based permutation test). *Left.* Power changes after the administration of atomoxetine. *Right.* Power changes after the administration of donepezil. **(B)** Same as (A), but for Task-counting. The changes in low-frequency power, in combination with the reported decreases in alpha-band power, demonstrate a robust effect of both drugs on cortical dynamics.



*Pfeffer et al: Catecholamines Alter Cortical and Perceptual Variability*

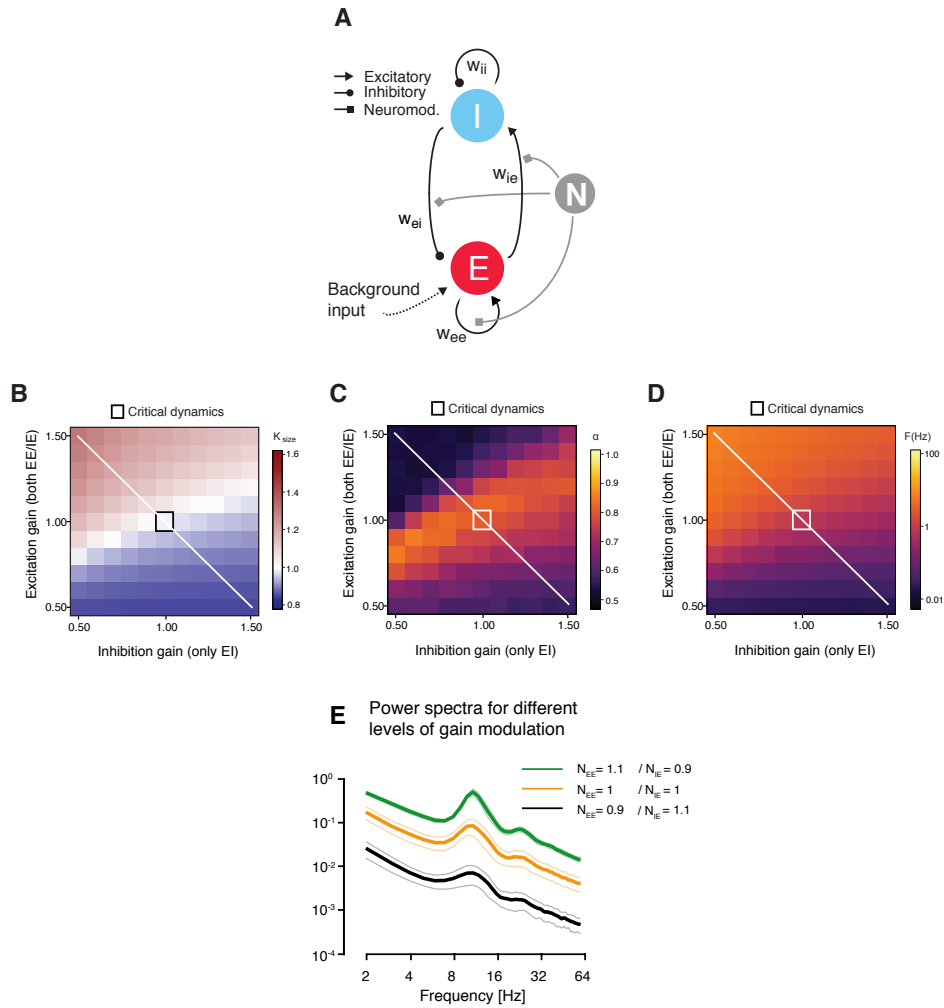

**S8 Fig.** Different version of modulation of E/I ratio in cortical patch model **(A)** Neuromodulation was simulated as a gain modulation term multiplied with excitatory (EE and IE) and/or inhibitory (EI only) synaptic weights. **(B)**  $\kappa$  as a function of excitatory and inhibitory connectivity (with a spacing of 2.5%; means across 10 simulations per cell). The region of  $\kappa \sim 1$ , overlaps with the region of  $\alpha > 0.5$  and splits the phase space into an excitation-dominant ( $\kappa > 1$ ) and an inhibition-dominant region ( $\kappa < 1$ ). **(C)** Same as (B), but for scaling exponent  $\alpha$ . **(D)** Same as (B) and (C), but for firing rate. In sum, the alternative version of modulation of E/I ratio yields comparable results to the version presented in Figure 8. **(E)** Model power spectra under different levels of synaptic gain modulation (neuromodulation).

*Pfeffer et al: Catecholamines Alter Cortical and Perceptual Variability*
